# Supplementary material for: Synthesis, self-assembly and biolabeling of perylene diimide-tyrosine alkyl amide based amphiphiles: nanomolar detection of AOT surfactant
Source: Royal Society of Chemistry journal article supplement (doi:10.1039/d2nj00093h), 2022-01-01
Supplement: d2nj00093h1.pdf [file d2nj00093h1.pdf]

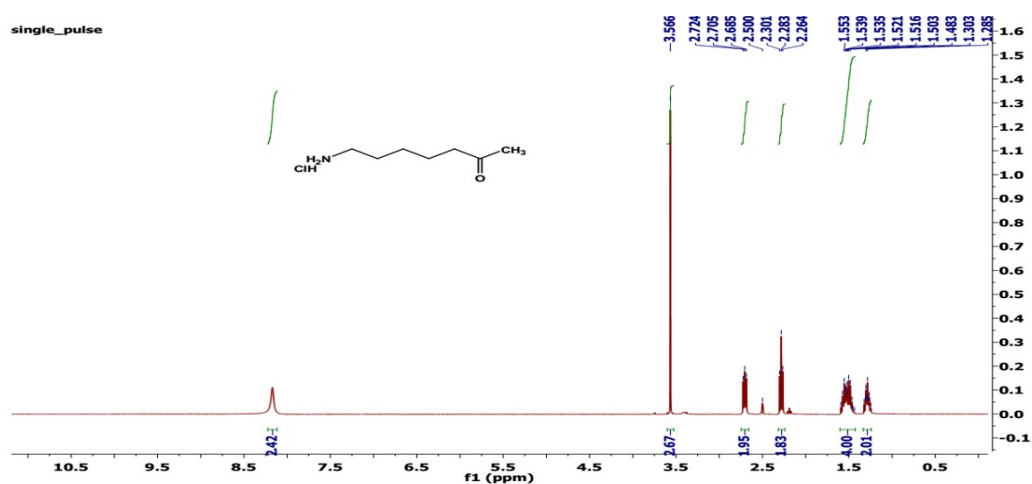

Figure S1a:  $^1\text{H}$  NMR spectrum of 6-aminocaproic methyl ester hydrochloride in  $\text{DMSO-}d_6$ .

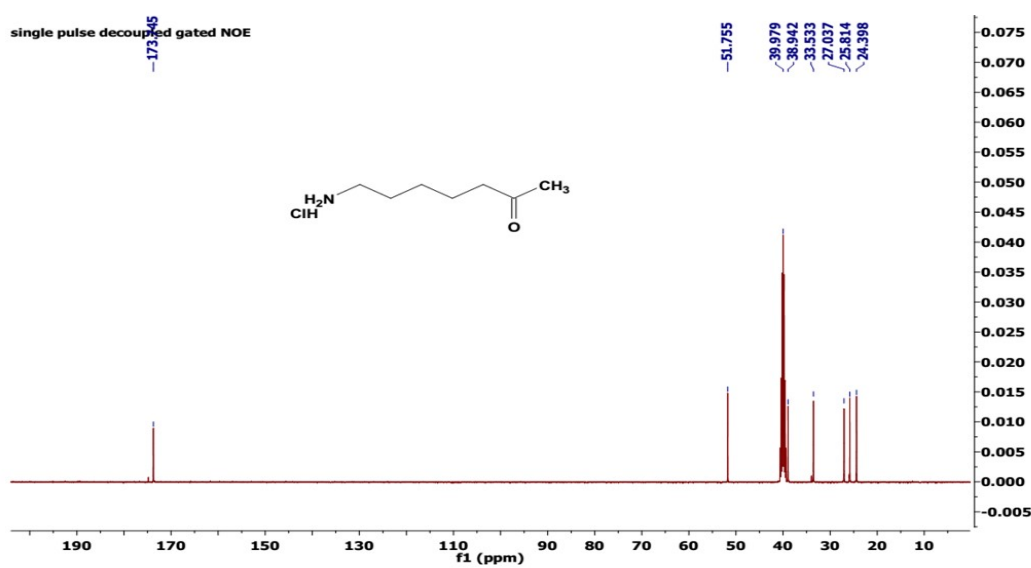

Figure S1b:  $^{13}\text{C}$  NMR spectrum of 6-aminocaproic methyl ester hydrochloride in  $\text{DMSO-}d_6$ .

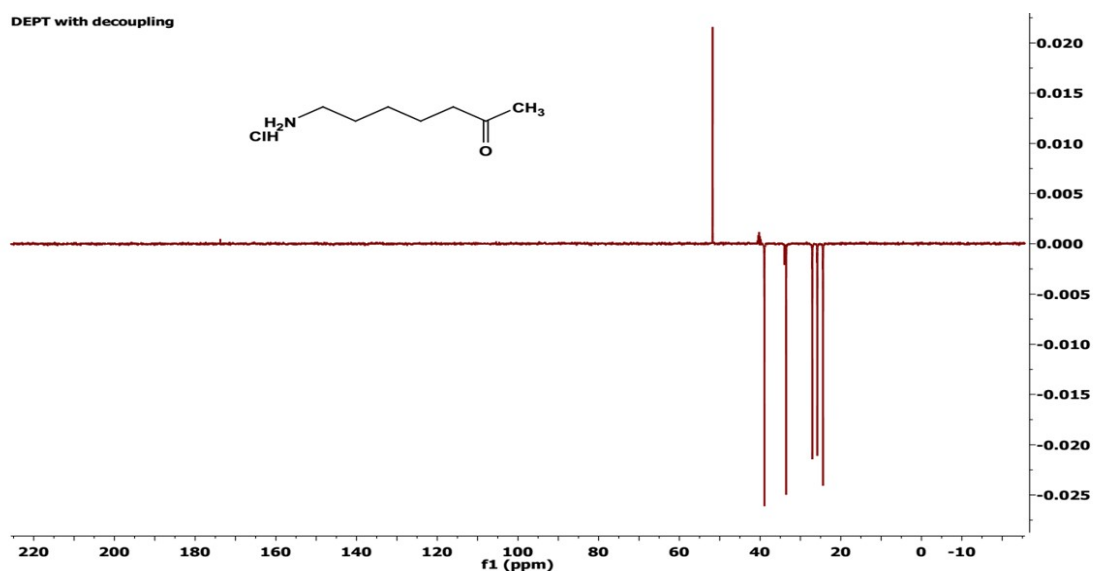

Figure S1c: DEPT-135 spectrum of 6-aminocaproic methyl ester hydrochloride in  $\text{DMSO-}d_6$ .

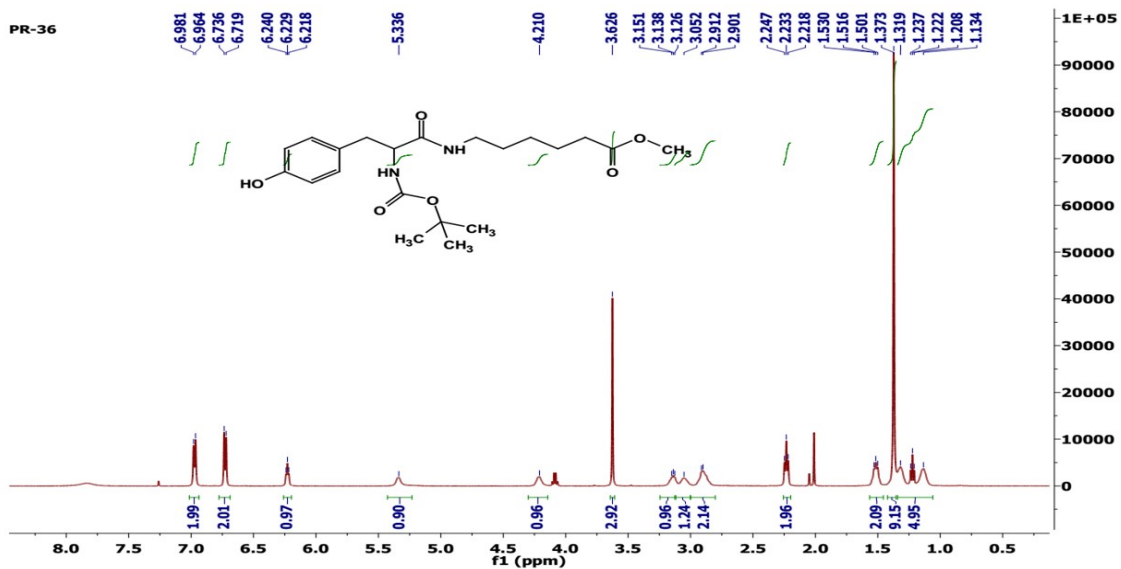

Figure S2a:  $^1\text{H}$  NMR spectrum of **1c** in  $\text{CDCl}_3$ .

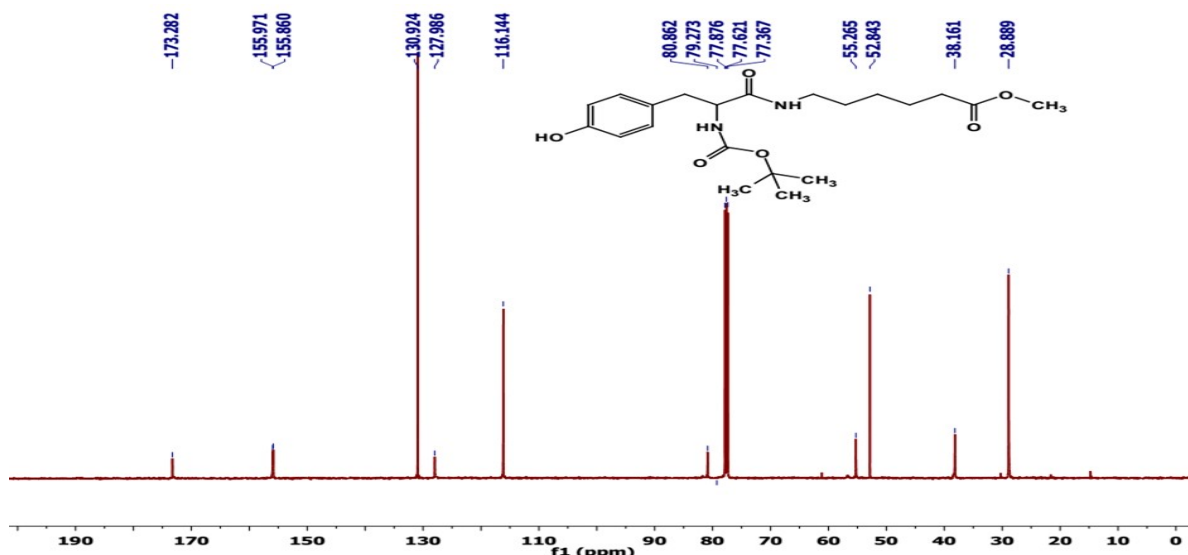

Figure S2b:  $^{13}\text{C}$  NMR spectrum of **1c** in  $\text{CDCl}_3$ .

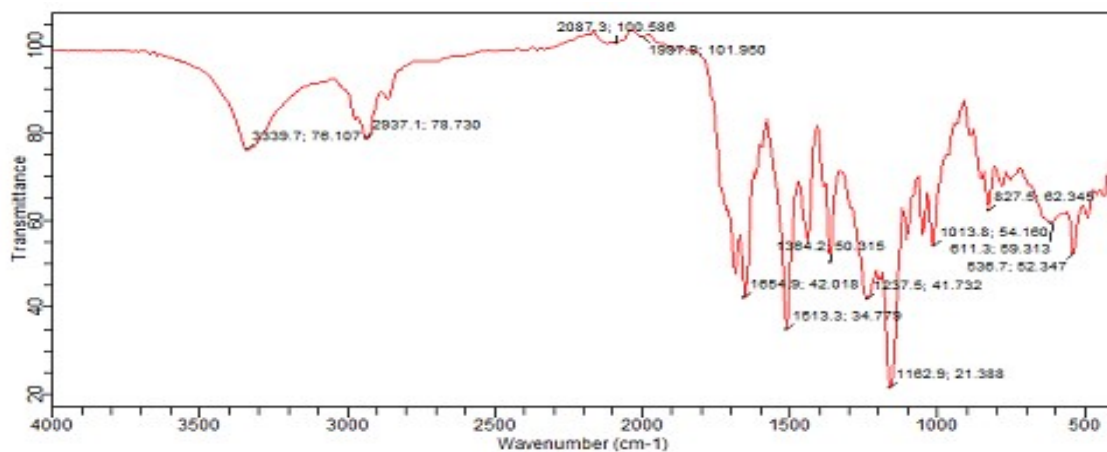

Figure S2c: FTIR spectrum of **1c**.

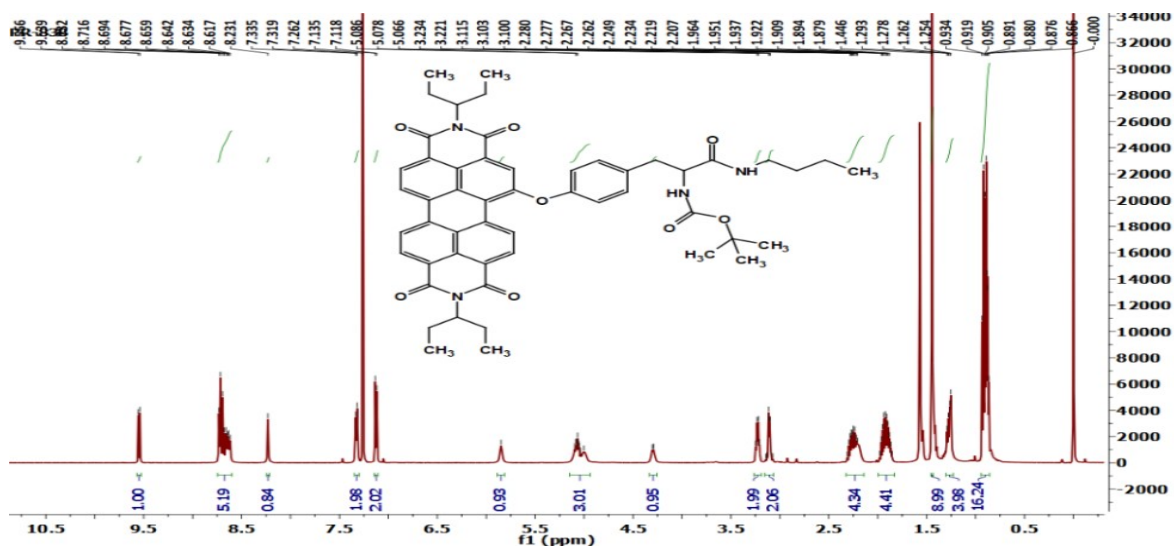

Figure S3a: <sup>1</sup>H NMR spectrum of PDI 2a in CDCl<sub>3</sub>.

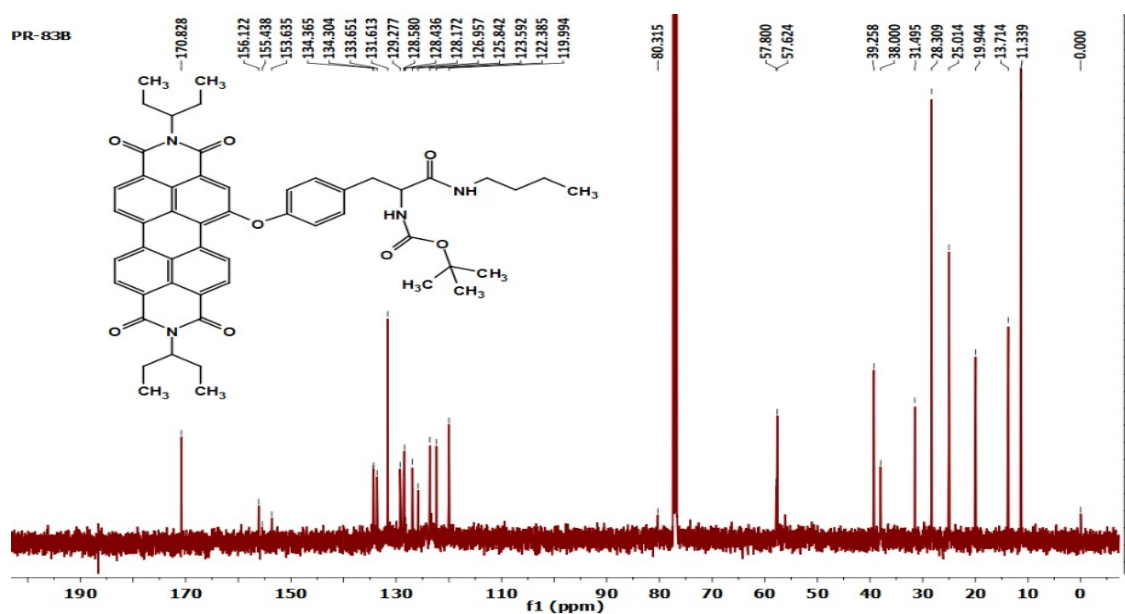

Figure S3b: <sup>13</sup>C NMR spectrum of PDI 2a in CDCl<sub>3</sub>.

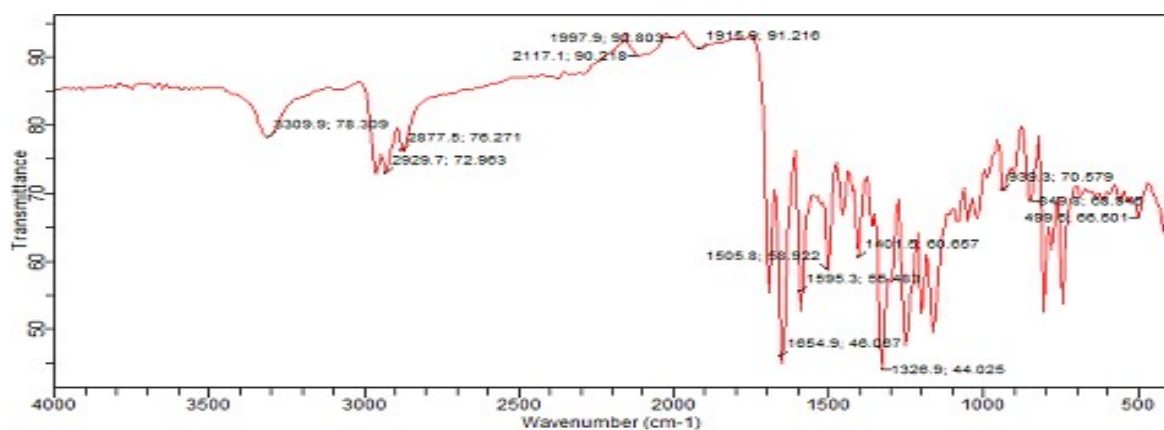

Figure S3c: FTIR spectrum of PDI 2a.

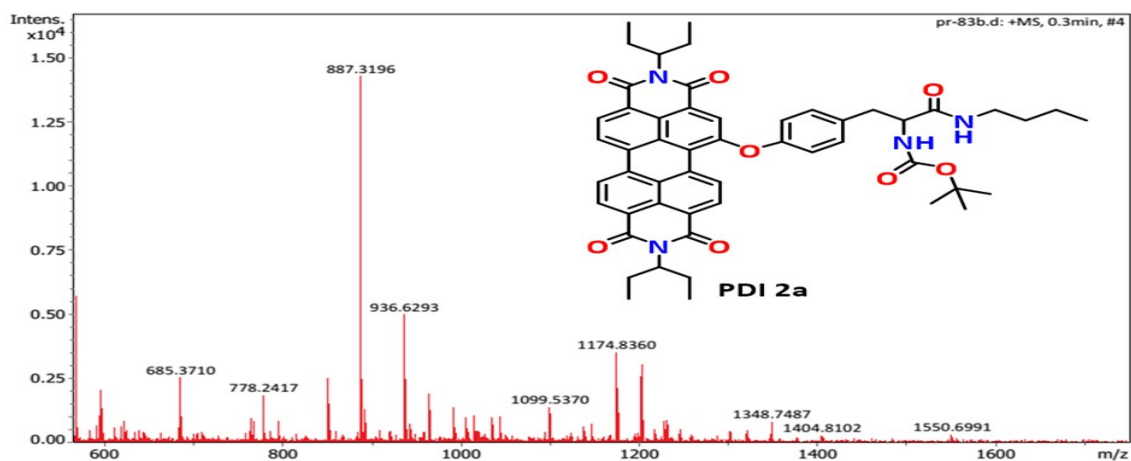

Figure S3d: Mass spectrum of PDI 2a.

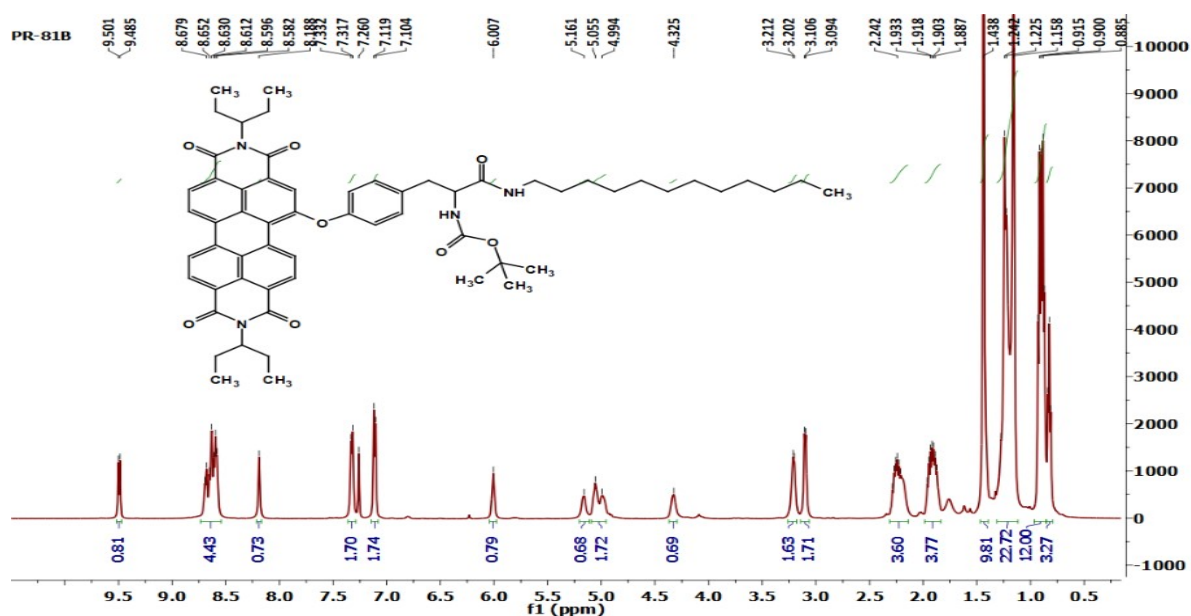

Figure S4a:  $^1\text{H}$  NMR spectrum of PDI 2b in  $\text{CDCl}_3$ .

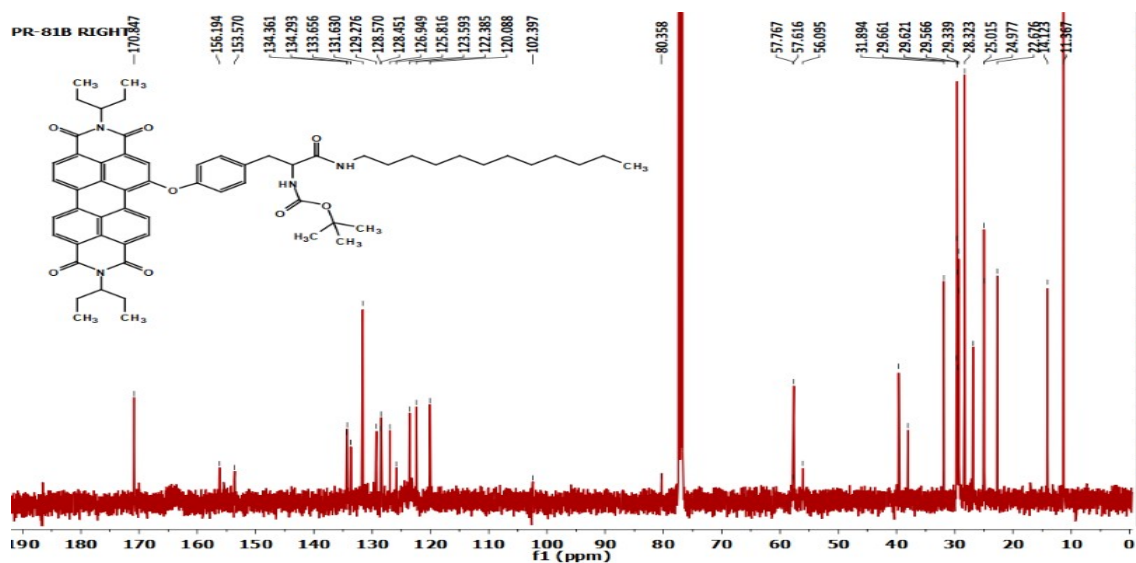

Figure S4b:  $^{13}\text{C}$  NMR spectrum of PDI 2b in  $\text{CDCl}_3$ .

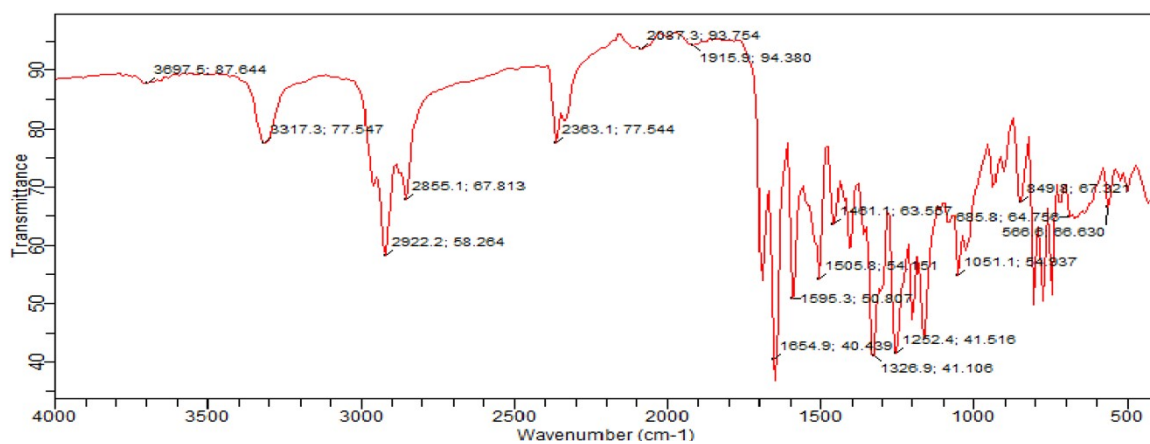

Figure S4c: FTIR spectrum of PDI 2b.

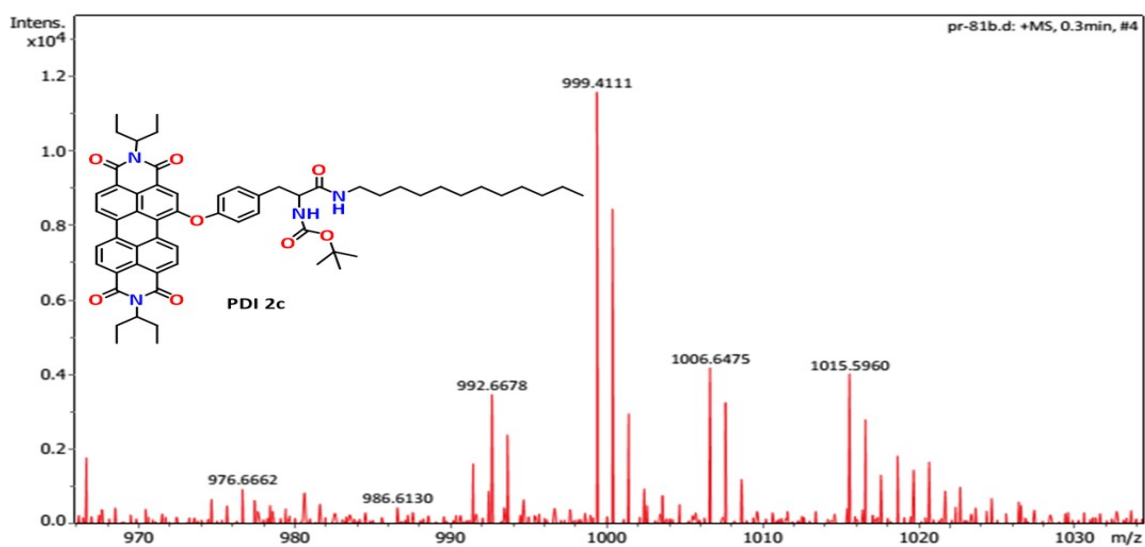

Figure S4d: Mass spectrum of PDI 2b.

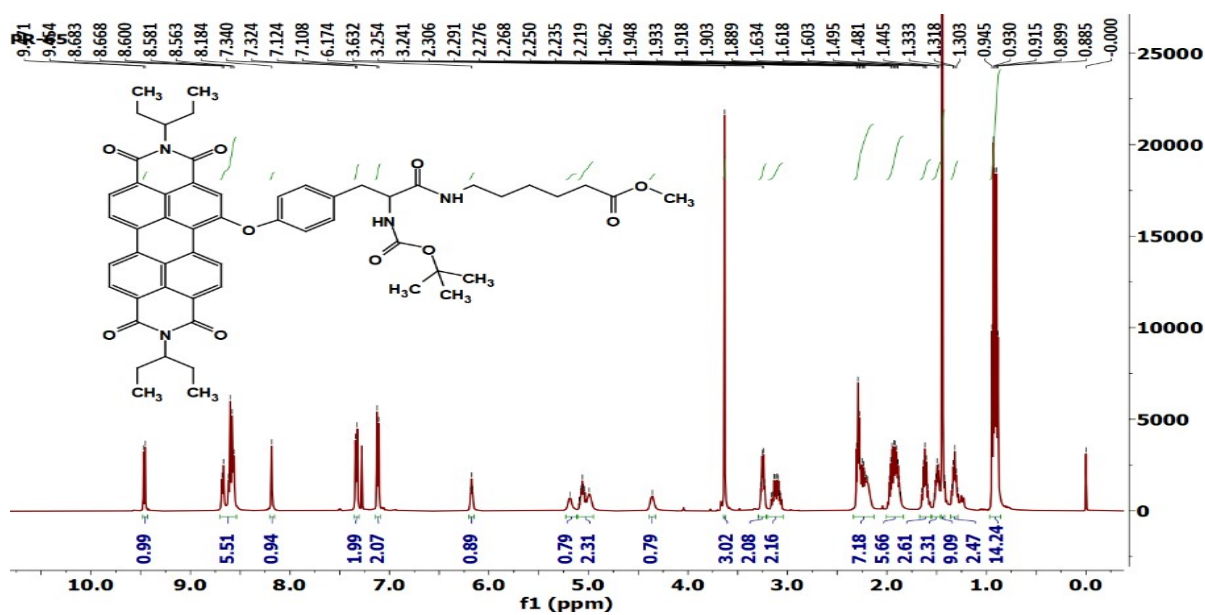

Figure S5a: <sup>1</sup>H NMR spectrum of PDI 2c in CDCl<sub>3</sub>.

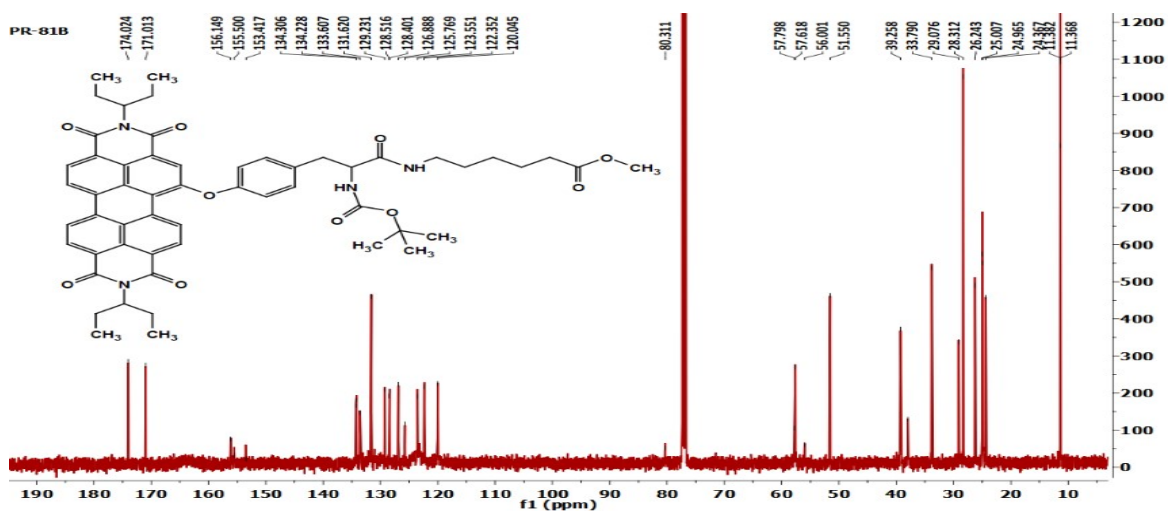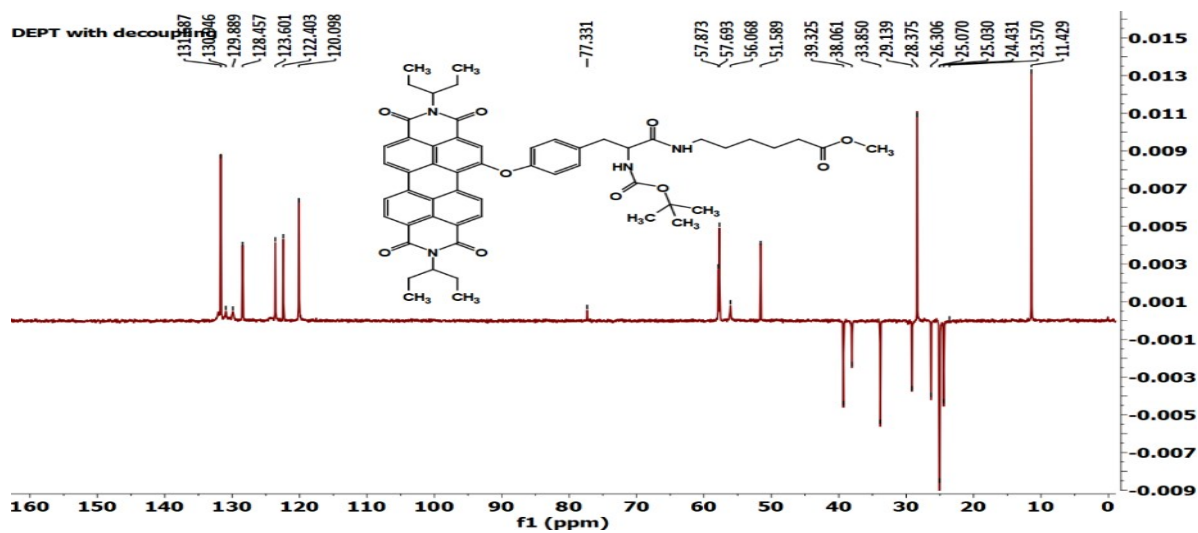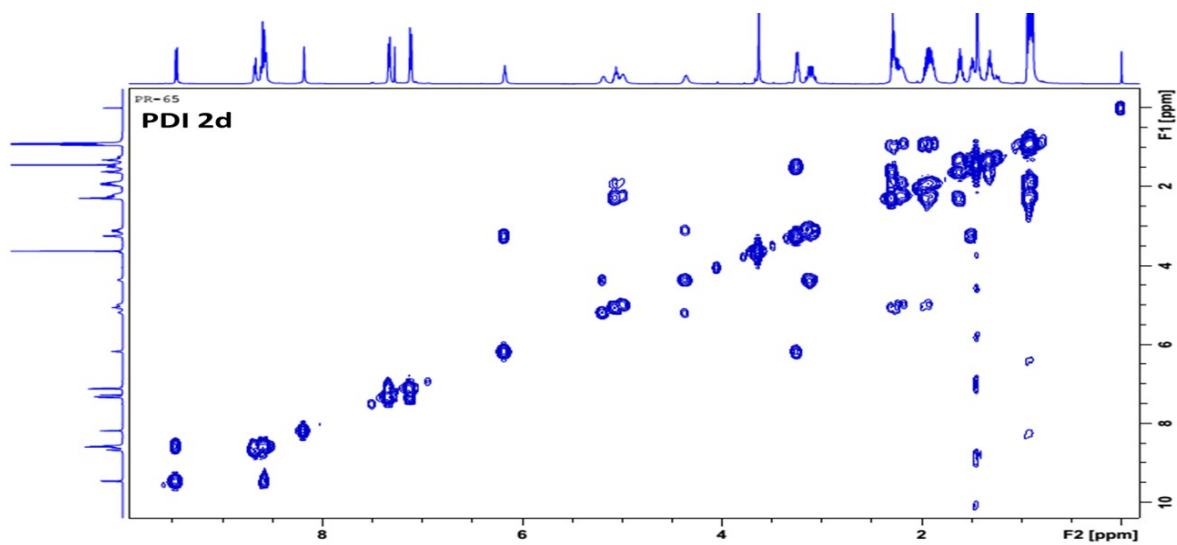

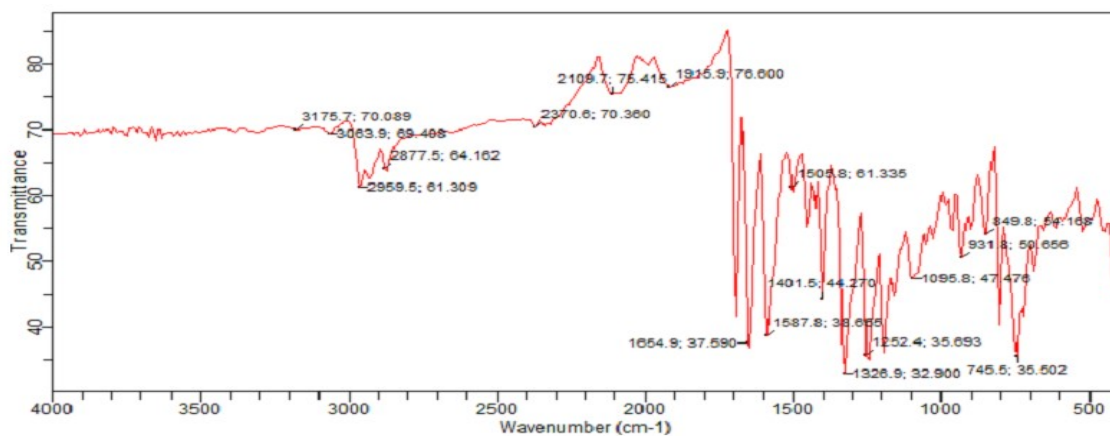

Figure S5e: FTIR spectrum of PDI **2c**.

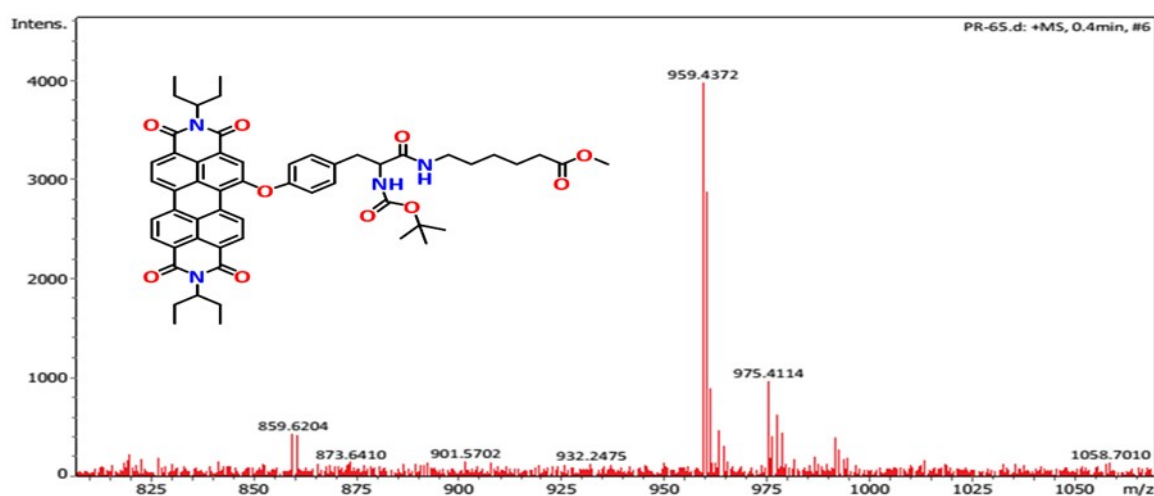

Figure S5f: Mass spectrum of PDI **2c**.

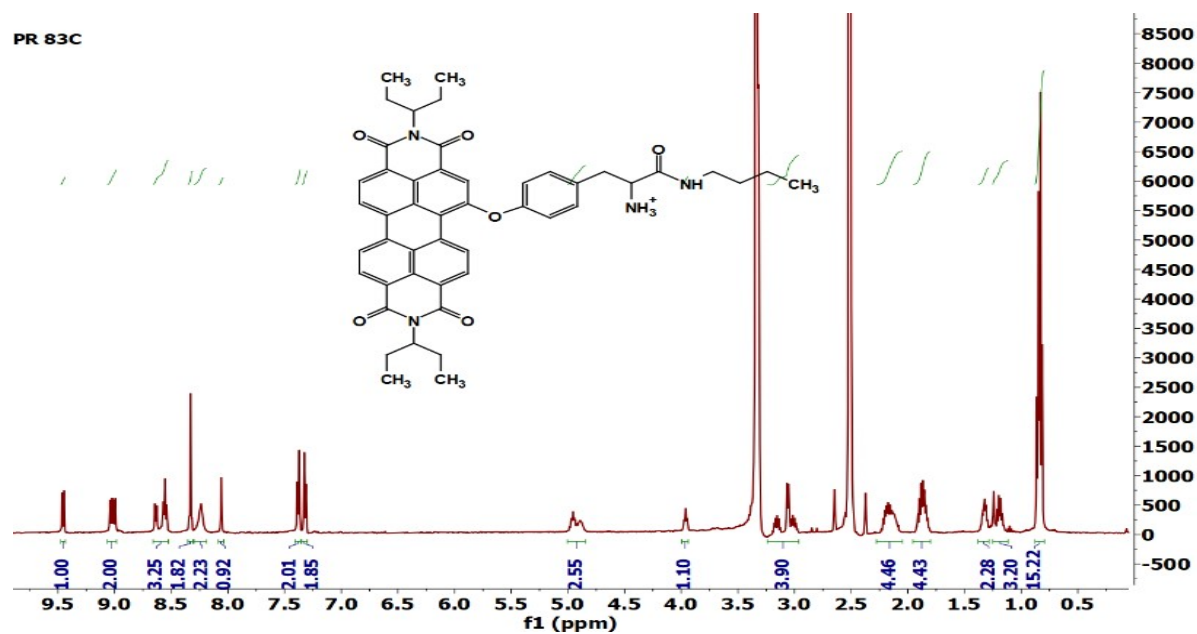

Figure S6a:  $^1\text{H}$  NMR spectrum of PDI **3a** in  $\text{CDCl}_3$ .



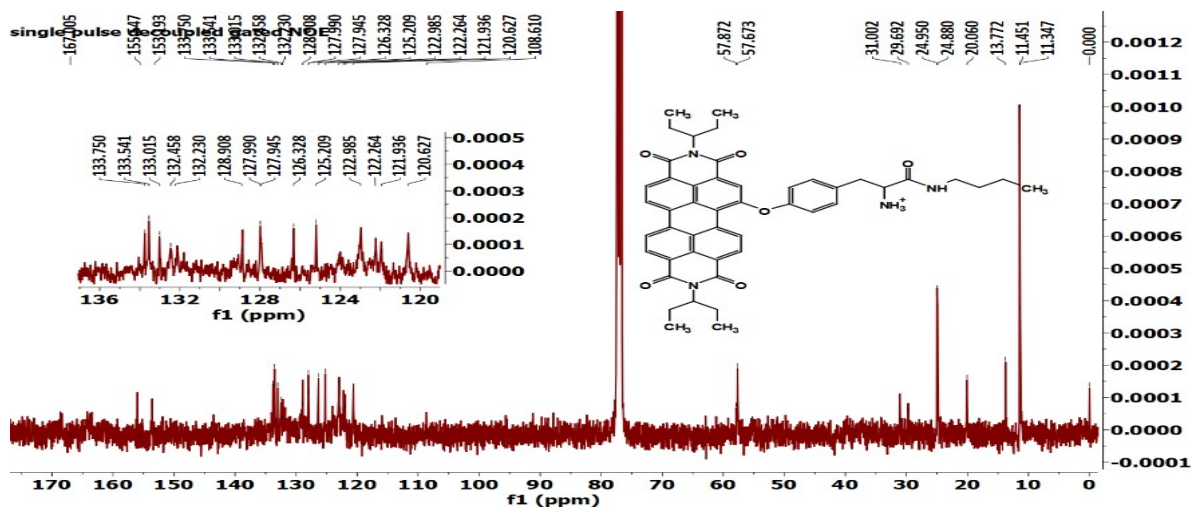

Figure S6b:  $^{13}\text{C}$  NMR spectrum of PDI **3a** in  $\text{CDCl}_3$ .

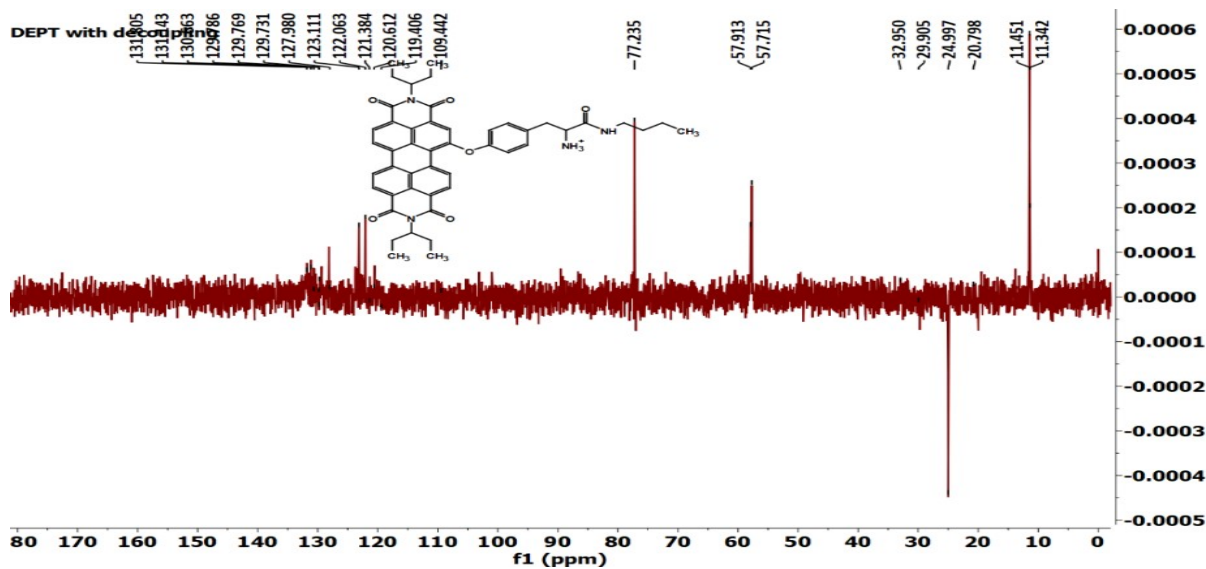

Figure S6c: DEPT-135 spectrum of PDI **3a** in  $\text{CDCl}_3$ .

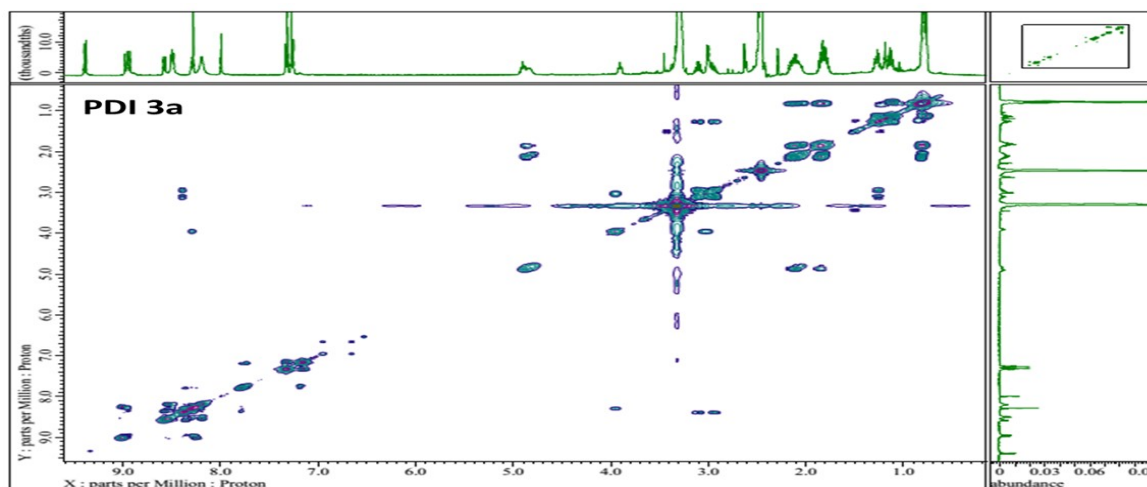

Figure S6d:  $^1\text{H}$ - $^1\text{H}$  COSY NMR spectrum of PDI **3a** in  $\text{CDCl}_3$ .

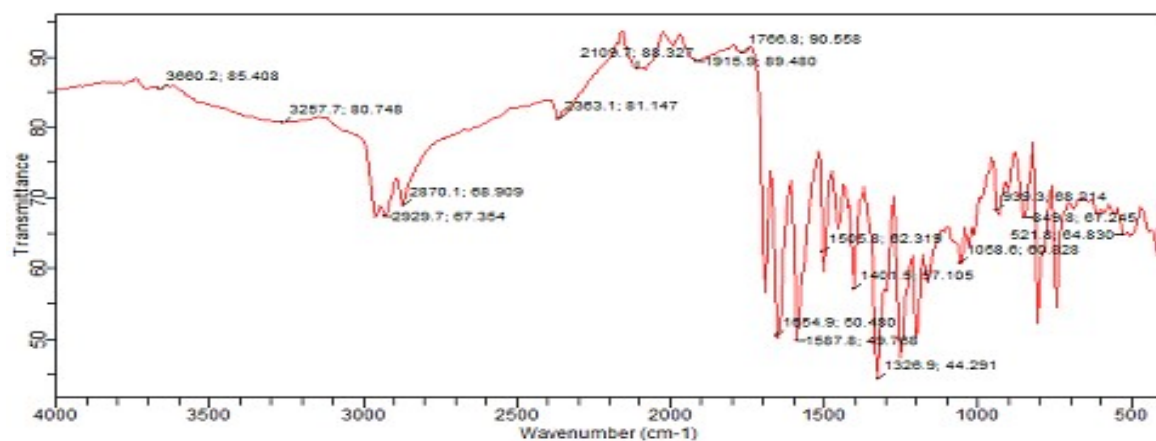

Figure S6e: FTIR spectrum of PDI 3a.

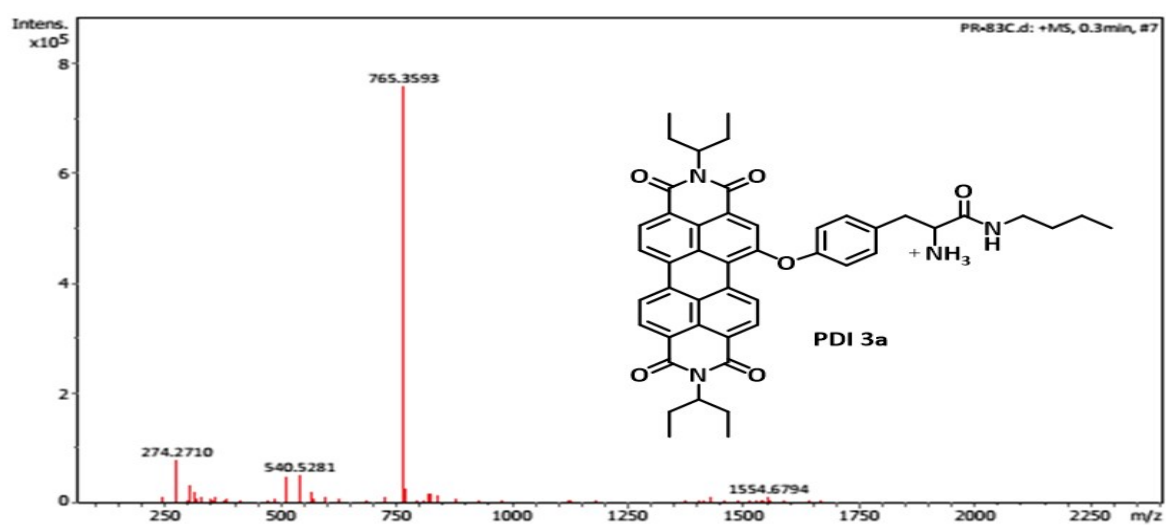

Figure S6f: Mass spectrum of PDI 3a.

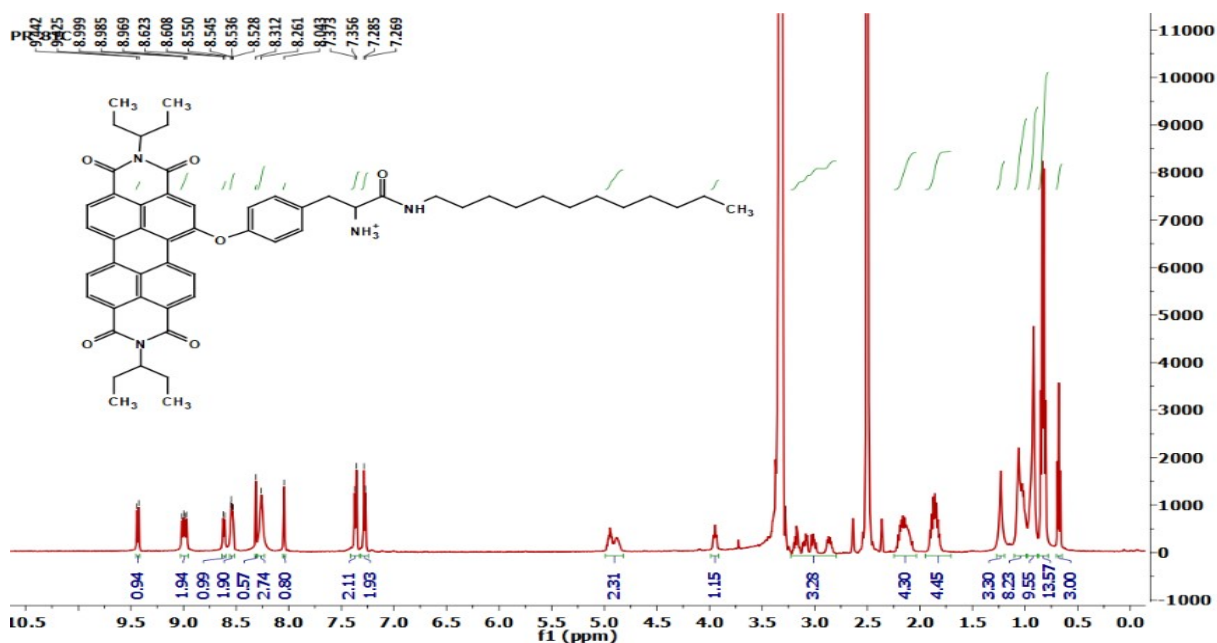

Figure S7a:  $^1\text{H}$  NMR spectrum of PDI 3b in  $\text{CDCl}_3$ .

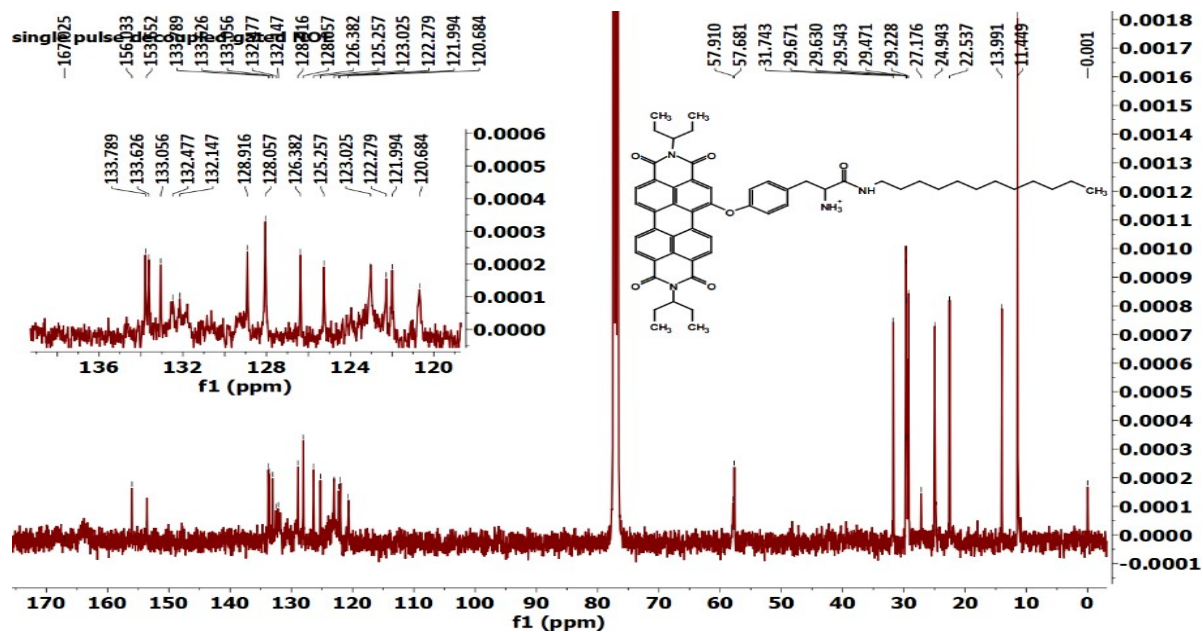

Figure S7b:  $^{13}\text{C}$  NMR spectrum of PDI **3b** in  $\text{CDCl}_3$ .

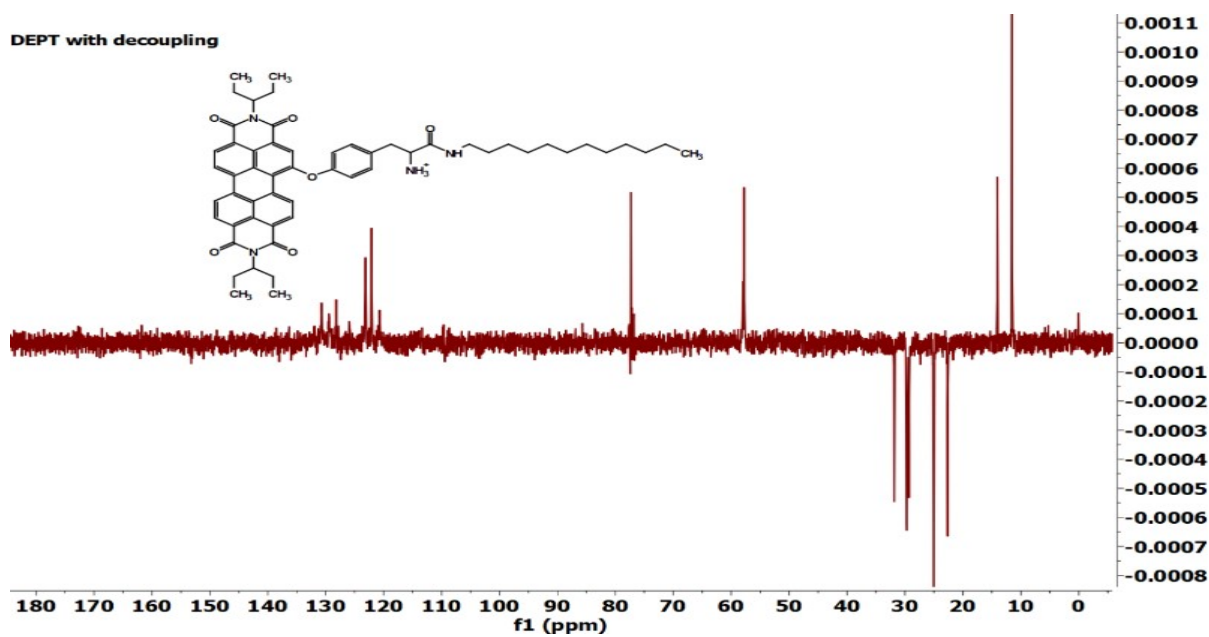

Figure S7c: DEPT-135 spectrum of PDI **3b** in  $\text{CDCl}_3$ .

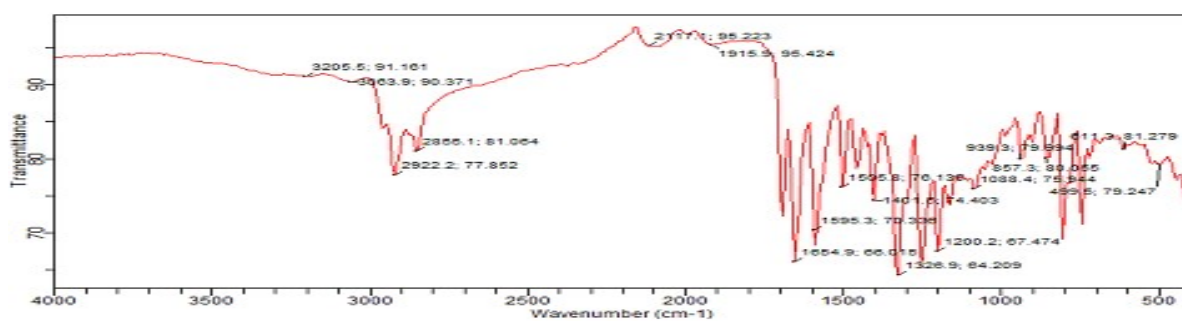

Figure S7d: FTIR spectrum of PDI **3b**.

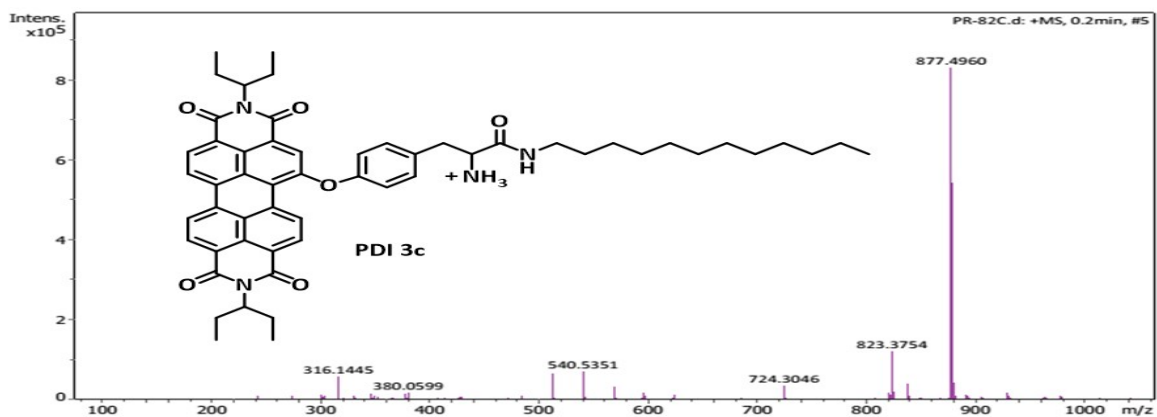

Figure S7e: Mass spectrum of PDI 3b.

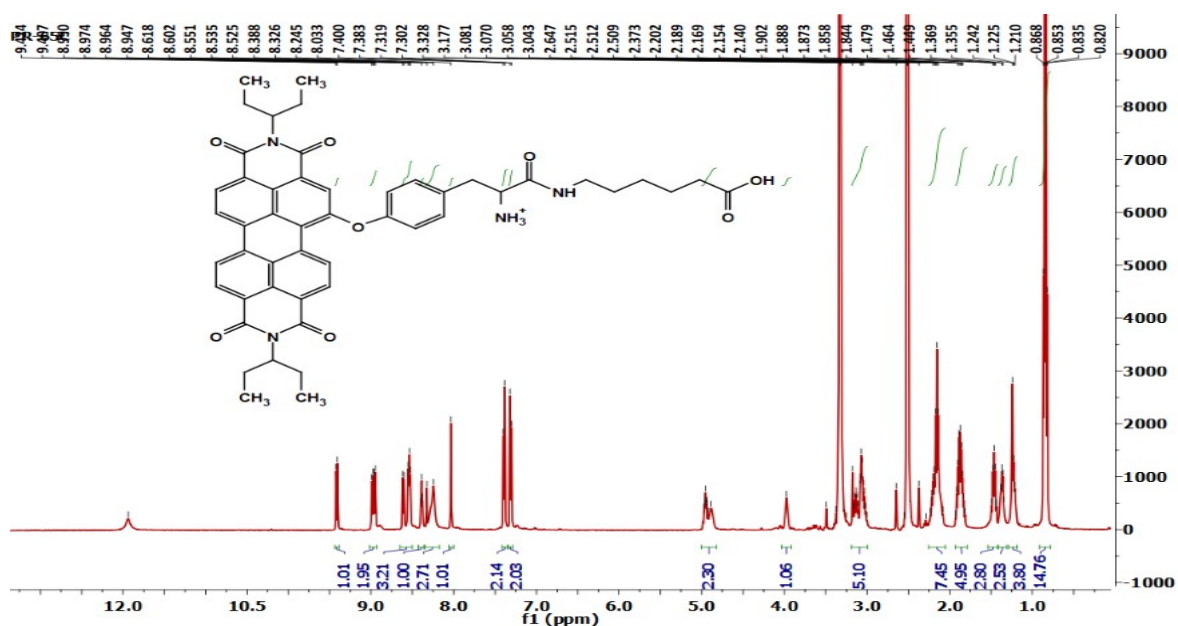

Figure S8a <sup>1</sup>H NMR spectrum of PDI 3c in CDCl<sub>3</sub>.

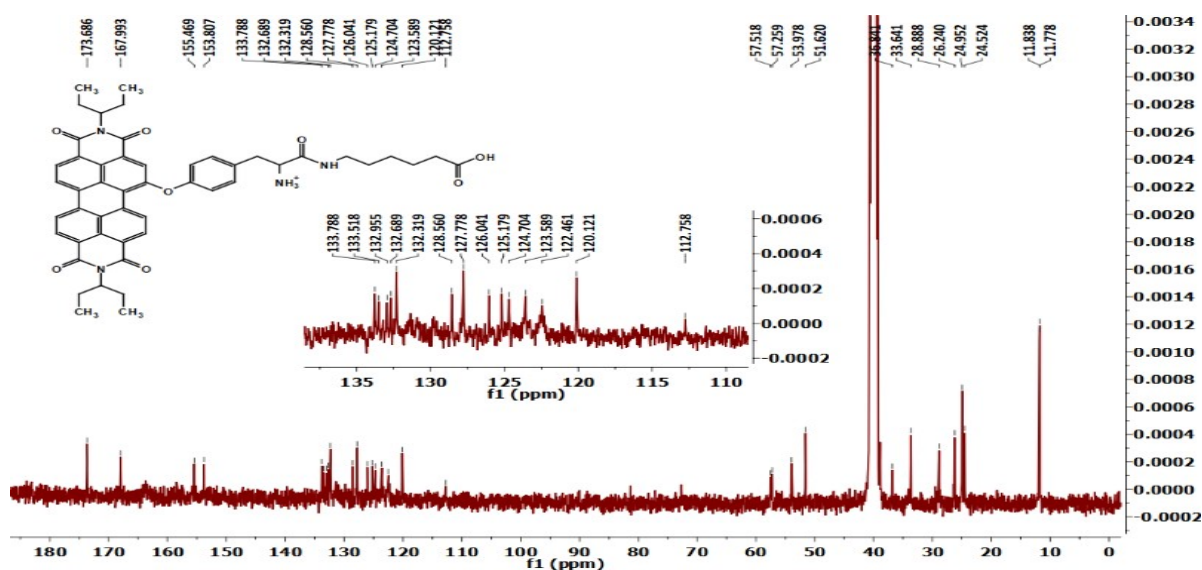

Figure S8b: <sup>13</sup>C NMR spectrum of PDI 3c in CDCl<sub>3</sub>.

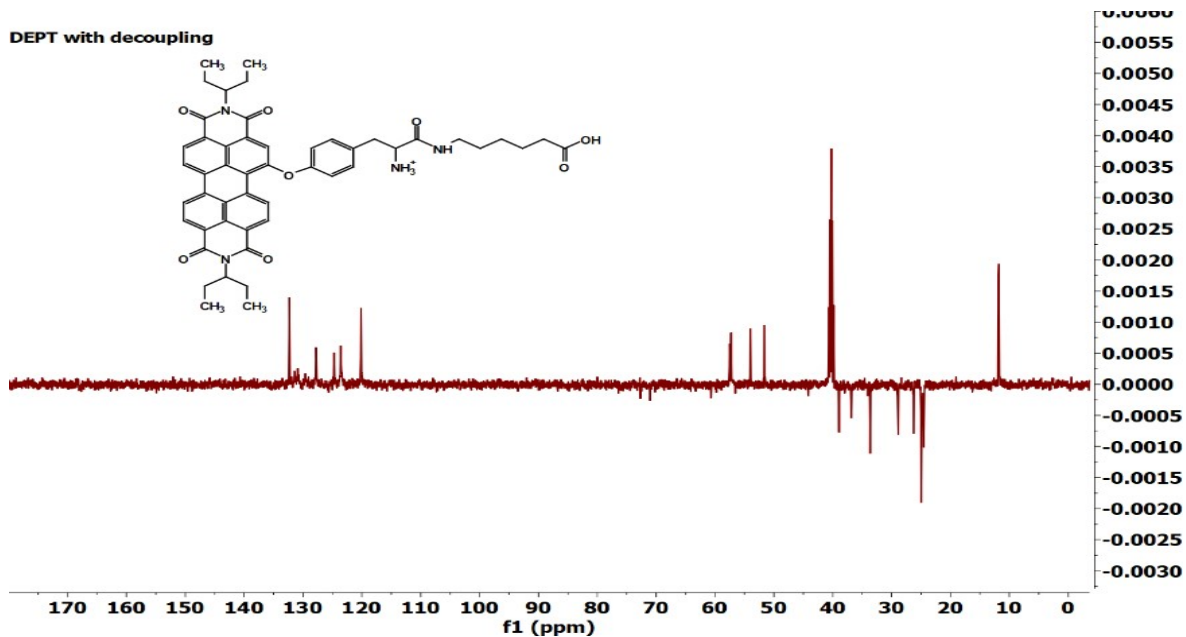

**Figure S8c:** DEPT-135 spectrum of PDI **3c** in  $\text{CDCl}_3$ .

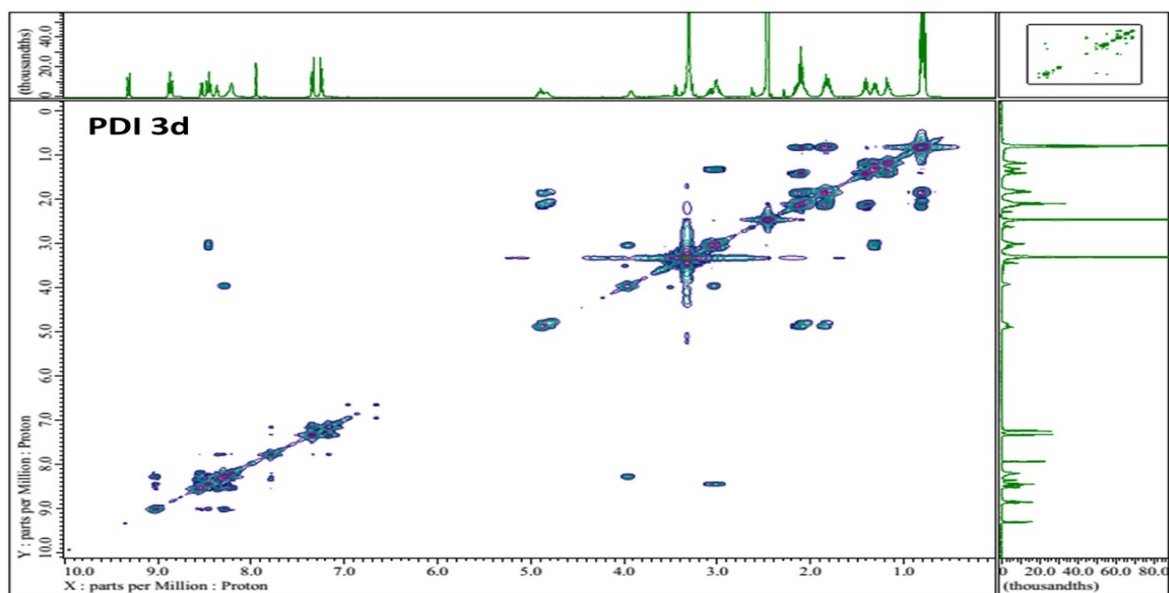

**Figure S8d:**  $^1\text{H}$ - $^1\text{H}$  COSEY NMR spectrum of PDI **3c** in  $\text{CDCl}_3$ .

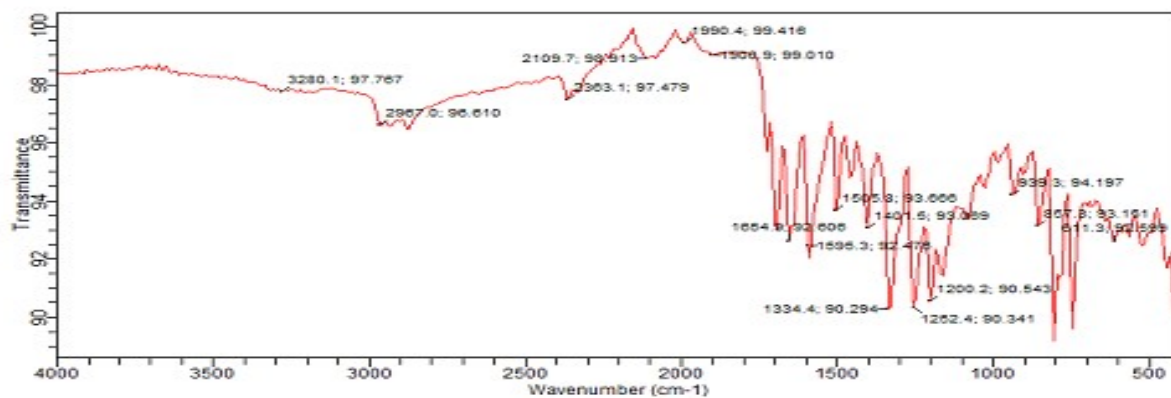

**Figure S8e:** FTIR spectrum of PDI **3c**.

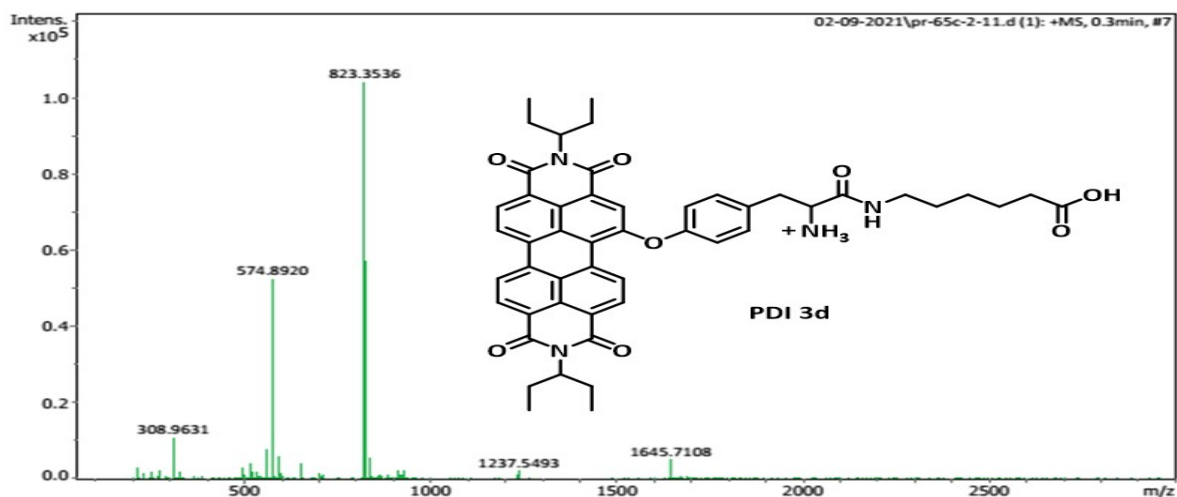

Figure S8f: Mass spectrum of PDI 3c.

## 2. Optical data of PDI 2a-2d and PDI 3a-3d

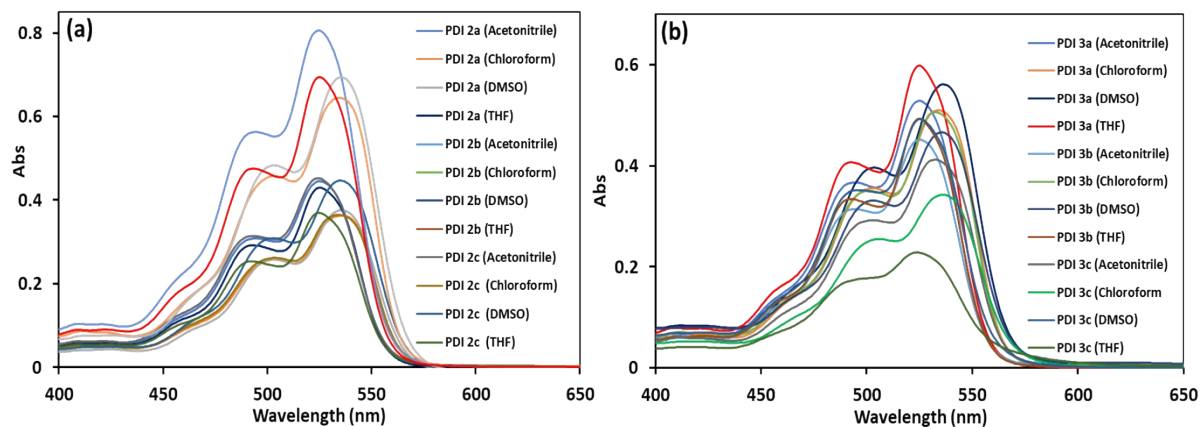

Figure S9: UV-Vis spectra of (a) PDI 2a–2c (10  $\mu\text{M}$ ); (b) PDI 3a–3c (10  $\mu\text{M}$ ) in different polarity solvents.

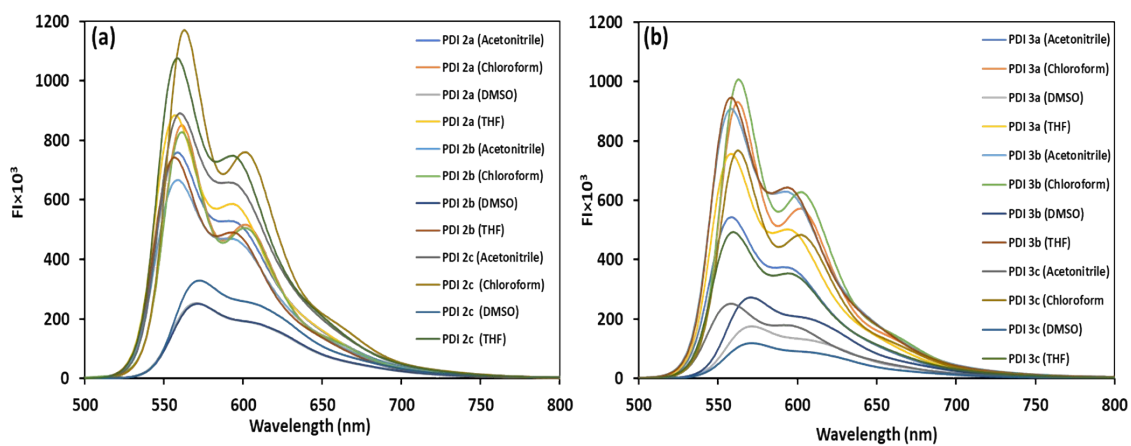

Figure S10: Fluorescence spectra of (a) PDI 2a–2c (10  $\mu\text{M}$ ); (b) PDI 3a–3c (10  $\mu\text{M}$ ) recorded in different polarity solvents;  $\lambda_{\text{ex}} = 490 \text{ nm}$ , slit width (ex/em) = 5/5.

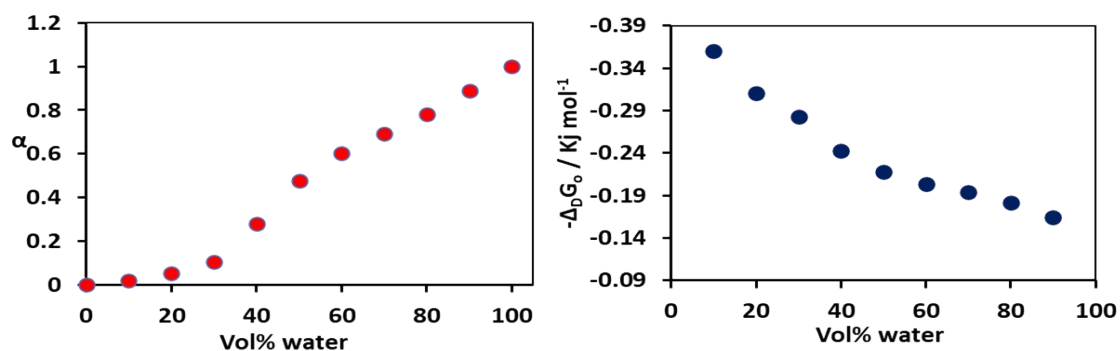

**Figure S11a:** Plot between degree of aggregation ( $\alpha$ ) and  $\Delta G$  and volume % of water for PDI **3a**.

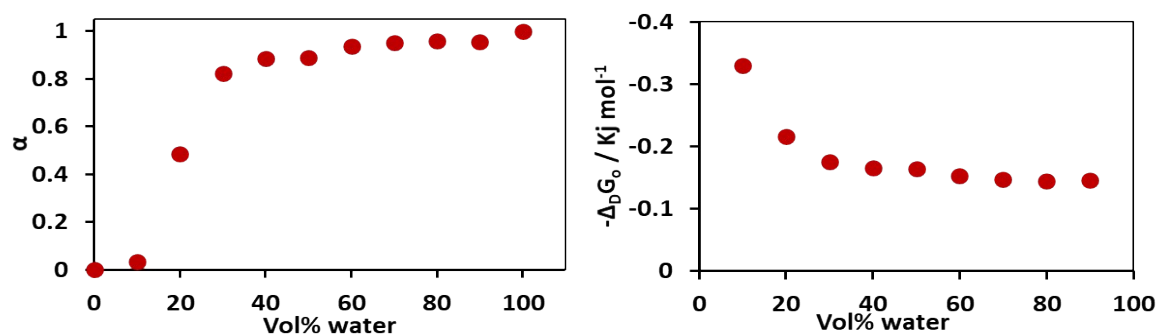

**Figure S11b:** Plot between degree of aggregation ( $\alpha$ ) and  $\Delta G$  and volume % of water for PDI **3b**.

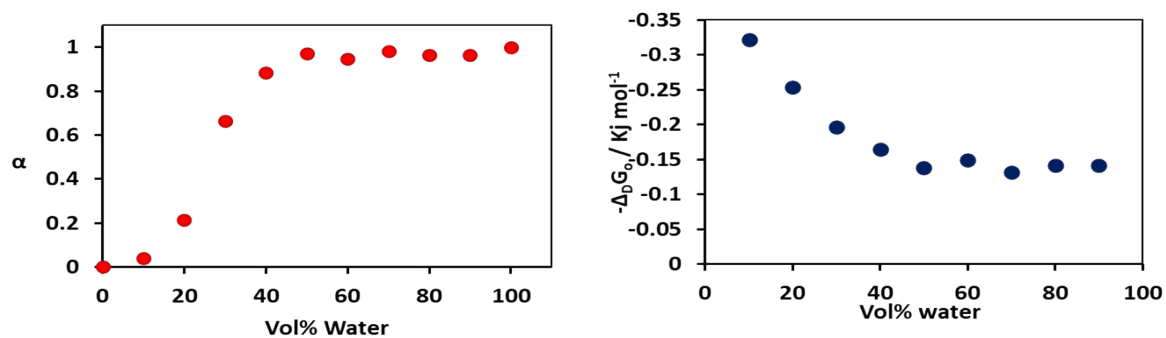

**Figure S11c:** Plot between degree of aggregation ( $\alpha$ ) and  $\Delta G$  and volume % of water for PDI **3c**.

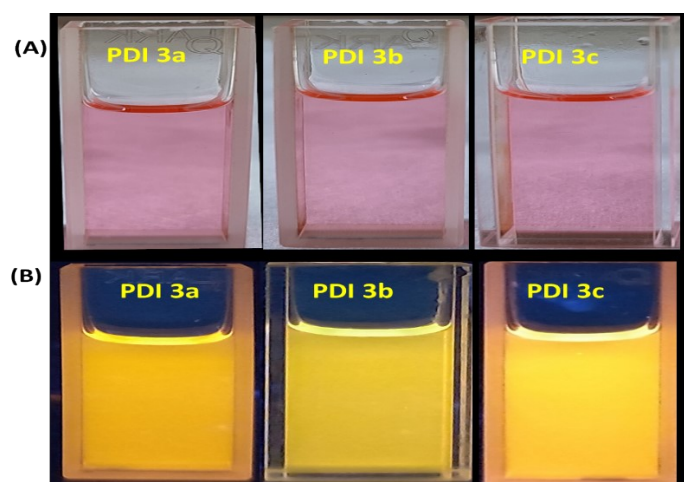

**Figure S11d:** Images of PDI **3a-3c** in DMSO (as monomer state) under (a) ambient light and (b) 365 nm UV lamp.

**Table S1:** Franck-Codon ratio of PDI 3a-3c derivatives.

| Vol% Water | PDI 3a   | PDI 3b   | PDI 3c   |
|------------|----------|----------|----------|
| 0          | 1.438272 | 1.42807  | 1.412903 |
| 10         | 1.4375   | 1.417857 | 1.384365 |
| 20         | 1.39441  | 1.245283 | 1.361624 |
| 30         | 1.247839 | 0.88172  | 1.178947 |
| 40         | 1.102639 | 0.793478 | 0.859551 |
| 50         | 1.022556 | 0.751295 | 0.757576 |
| 60         | 1.039867 | 0.731844 | 0.722826 |
| 70         | 0.97992  | 0.732558 | 0.72619  |
| 80         | 0.895833 | 0.729412 | 0.713483 |
| 90         | 0.837963 | 0.735294 | 0.729885 |
| 99         | 0.74359  | 0.736842 | 0.753247 |

**Table S2:** Fluorescence quantum yield of PDI 3a-3c derivatives in different water ratios.

| Vol% Water | PDI 3a | PDI 3b | PDI 3c |
|------------|--------|--------|--------|
| DMSO       | 49.7   | 57.1   | 65     |
| 30         | 45.4   | 22.4   | 53.9   |
| 50         | 23.2   | 3.7    | 8.0    |
| 70         | 23.5   | 3.3    | 4.5    |
| 90         | 10.3   | 3.16   | 3.8    |
| 99         | 3.0    | 2.7    | 3.1    |

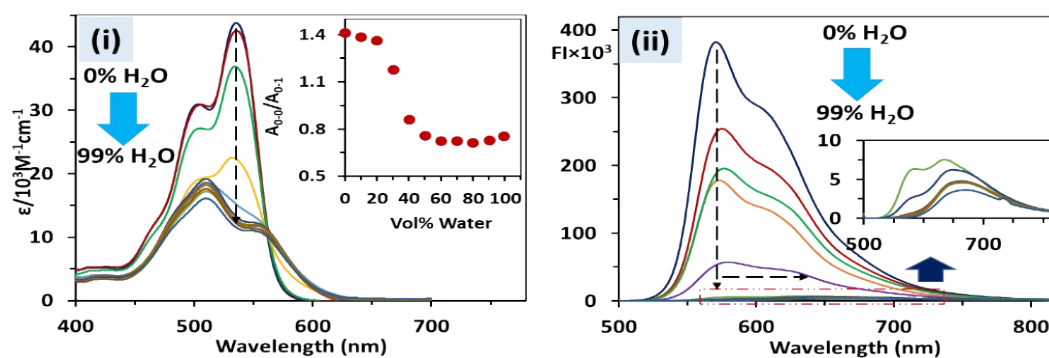**Figure S12.** The UV-vis and fluorescence spectra of (i,ii) PDI 3c derivatives showing aggregation behaviour in different H<sub>2</sub>O: DMSO ratios.  $\lambda_{\text{ex}} = 490 \text{ nm}$ , slit width (ex/em) = 5/5.



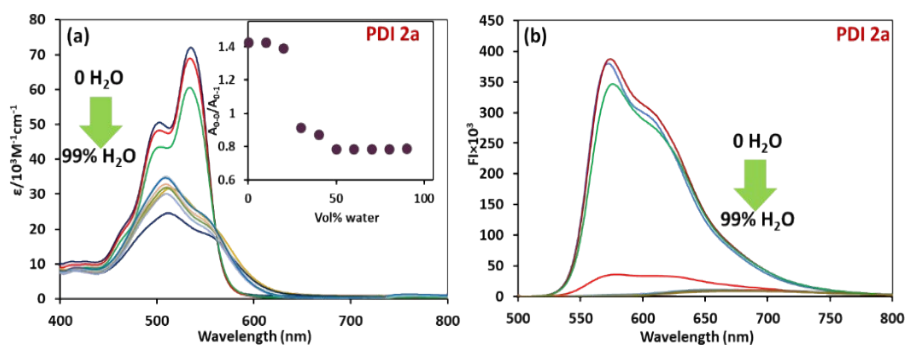

**Figure S13:** The UV-vis and fluorescence spectra of (a,b) PDI **2a** (10  $\mu$ M) respectively showing aggregation behaviour in different DMSO-water ratios.  $\lambda_{\text{ex}} = 490$  nm, slit width (ex/em) = 5/5.

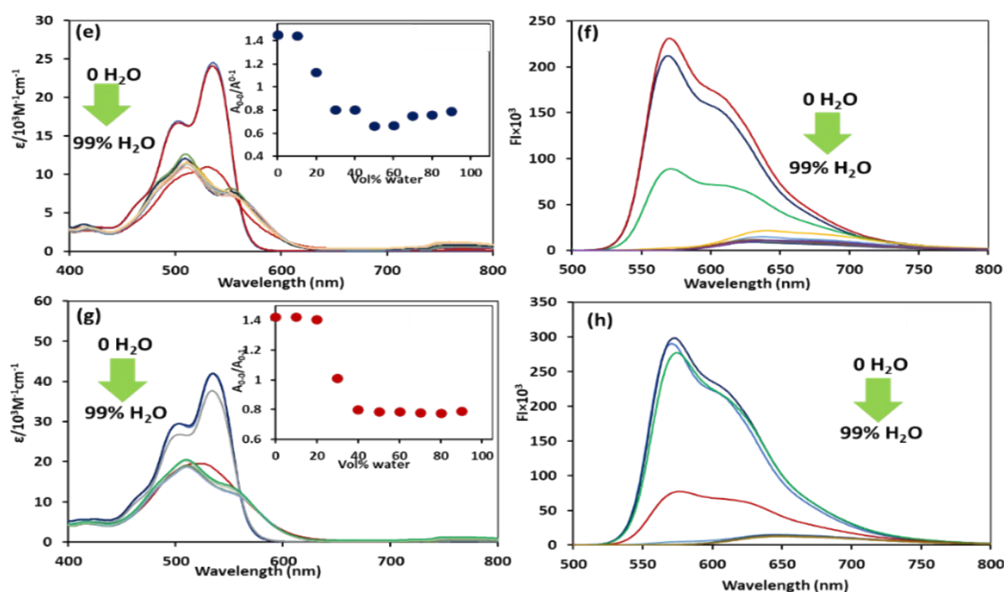

**Figure S14:** The UV-vis and fluorescence spectra of (e,f) PDI **2b** and (g,h) PDI **2c** (10  $\mu$ M) respectively showing aggregation behaviour in different DMSO-water ratios.  $\lambda_{\text{ex}} = 490$  nm, slit width (ex/em) = 5/5.

**Table S3:** Franck-Condon ratio of PDI **2a-2c** derivatives.

| Vol% Water | PDI <b>2a</b> | PDI <b>2b</b> | PDI <b>2c</b> |
|------------|---------------|---------------|---------------|
| 0          | 1.425743      | 1.449704      | 1.423729      |
| 10         | 1.423554      | 1.443114      | 1.423729      |
| 20         | 1.390805      | 1.125         | 1.406716      |
| 30         | 0.912458      | 0.803738      | 1.010989      |
| 40         | 0.872881      | 0.801887      | 0.798883      |
| 50         | 0.785714      | 0.661017      | 0.786885      |
| 60         | 0.783505      | 0.666667      | 0.787709      |
| 70         | 0.785047      | 0.75          | 0.779487      |
| 80         | 0.785924      | 0.759259      | 0.774359      |
| 90         | 0.786982      | 0.788991      | 0.790816      |

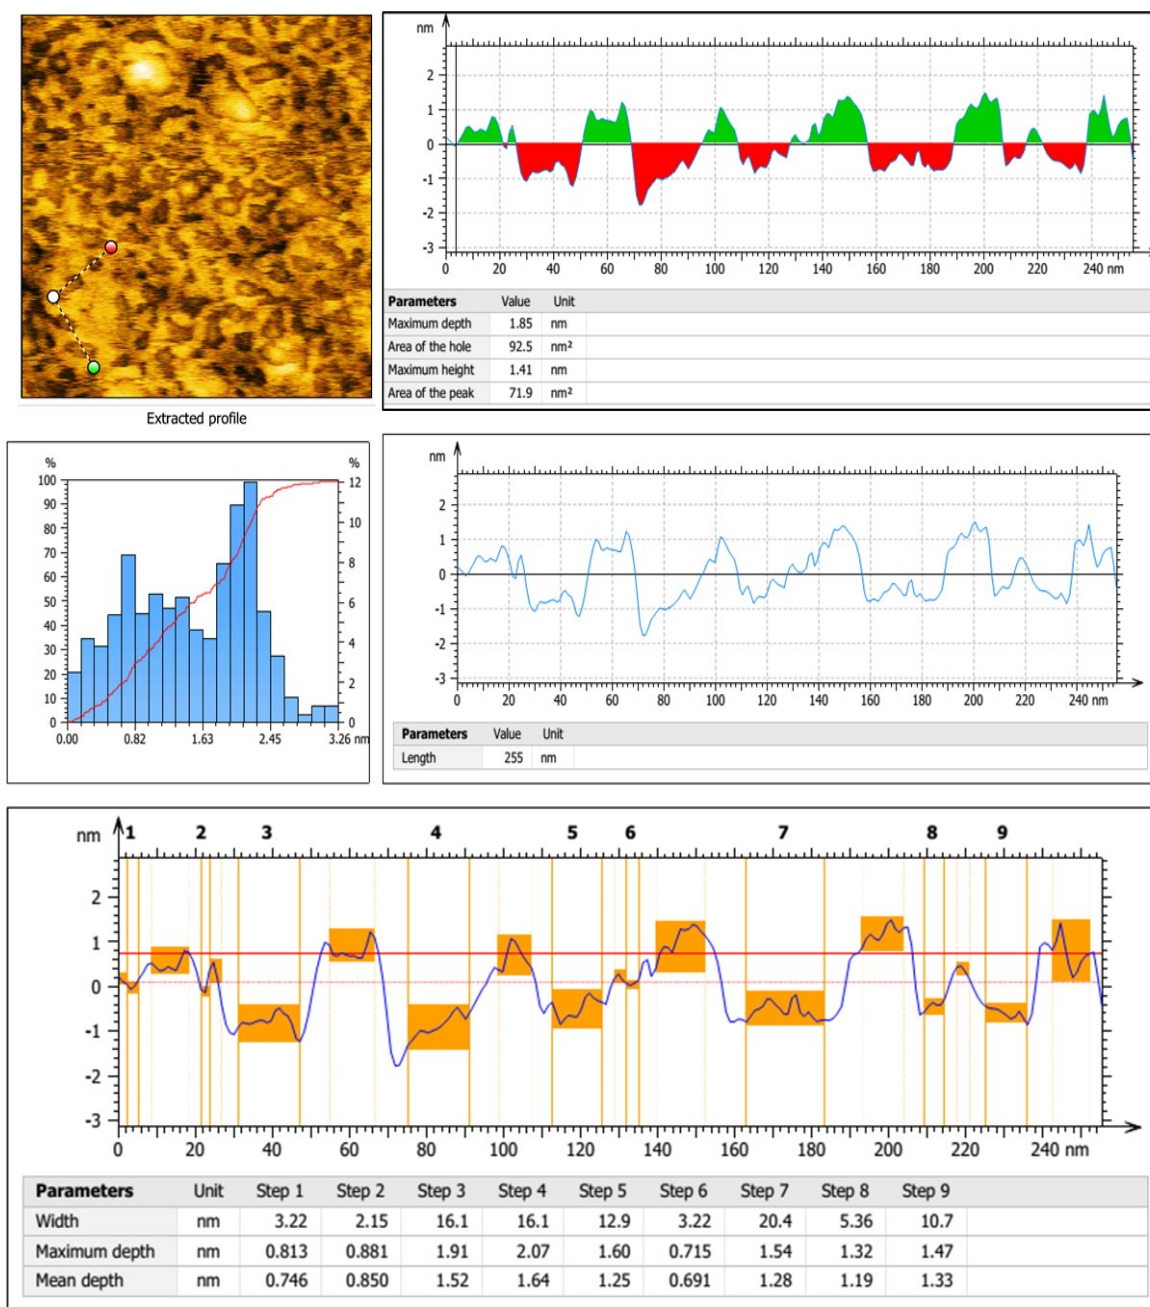

Figure S15: Extracted Height profile of PDI 3a (1  $\mu$ M).

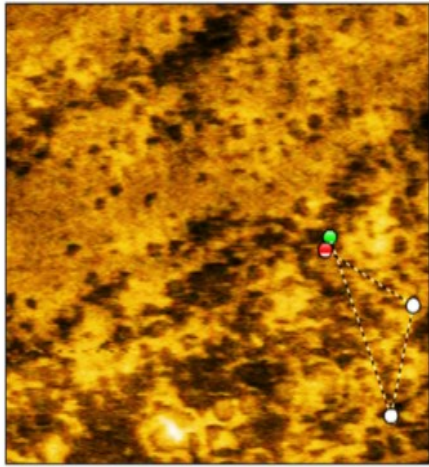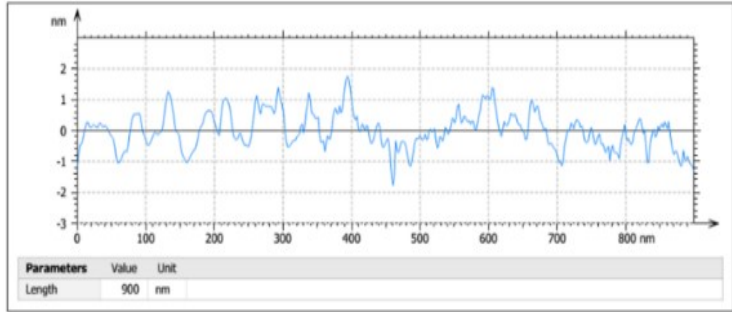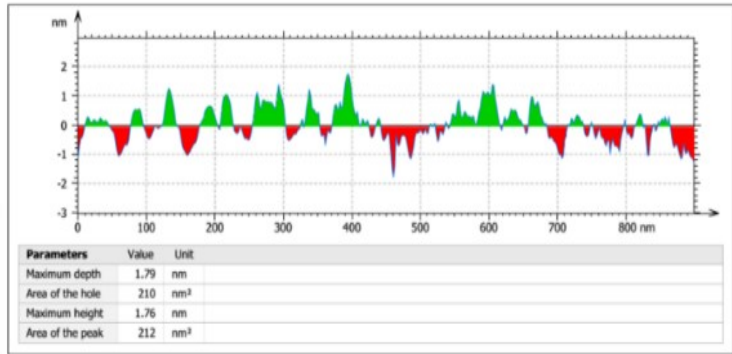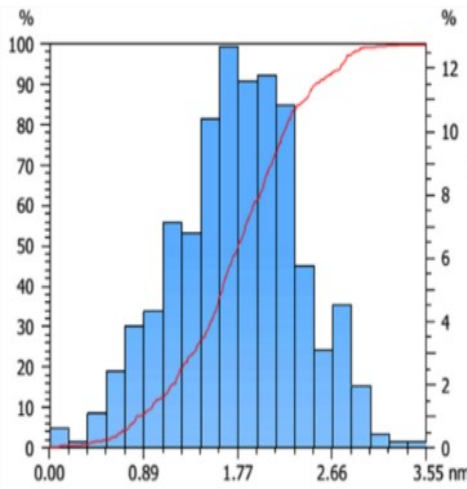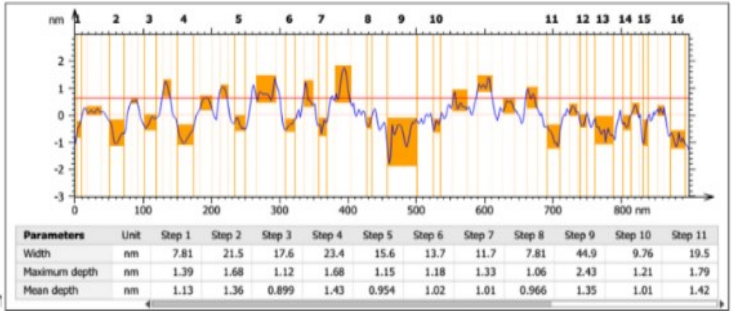

Figure S16: Extracted Height profile of PDI 3b (1  $\mu$ M).

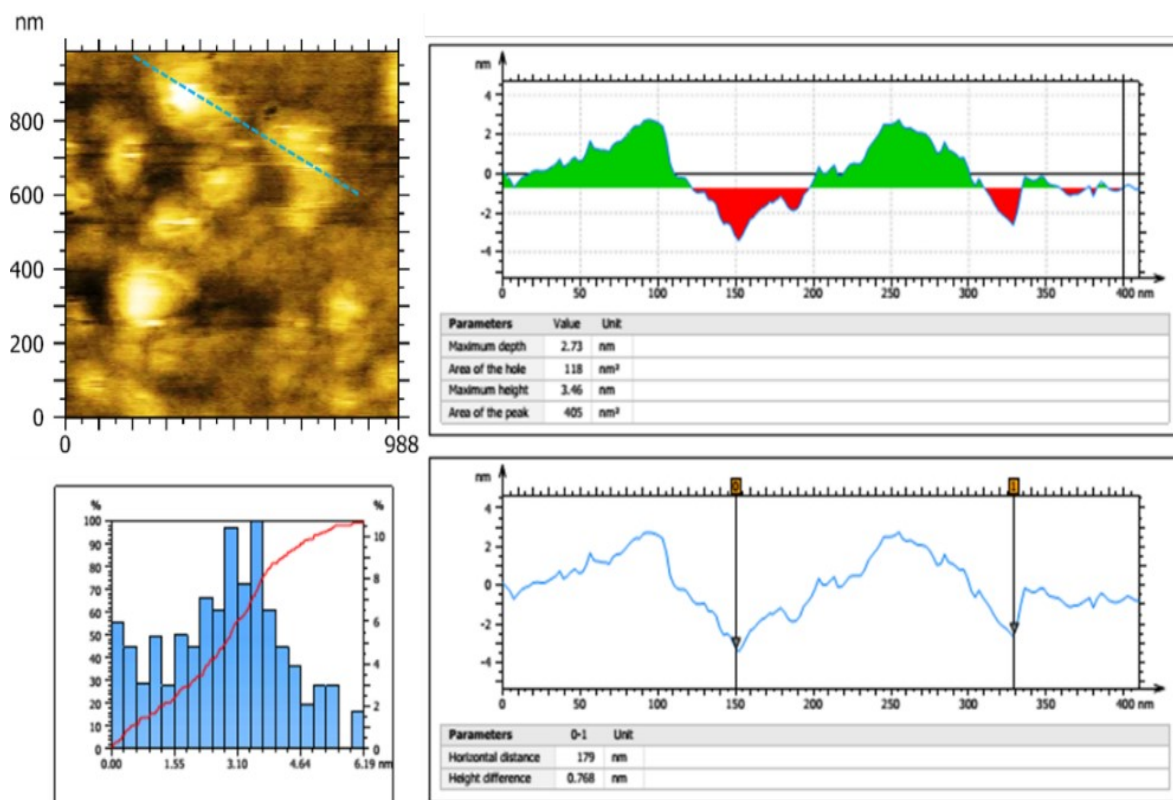

**Figure S17:** Extracted Height profile of PDI 3c (1  $\mu$ M).

**Table S4.** Spectral and photophysical characteristics of PDI **2a–2d** and PDI **3a–3d**.

| Spectral Characteristics                                           | PDI 2a     | PDI 2b        | PDI 2c        | PDI 3a           | PDI 3b         | PDI 3c        |
|--------------------------------------------------------------------|------------|---------------|---------------|------------------|----------------|---------------|
| Absorbance $\lambda_{\text{max}}$ [nm]                             | 535        | 535           | 535           | 535              | 537            | 536           |
| Fluorescence $\lambda_{\text{max}}$ [nm]                           | 571        | 571           | 573           | 574              | 572            | 572           |
| $\epsilon$ (molar absorptivity) [ $\text{M}^{-1} \text{cm}^{-1}$ ] | 44700      | 37700         | 69500         | 53500            | 53700          | 53600         |
| Stoke Shift (in nm)                                                | 36         | 36            | 38            | 39               | 35             | 36            |
| Quantum Yield ( $\Phi$ in %) in DMSO                               | 53.82      | 77.71         | 70.52         | 49.74            | 57.12          | 65.11         |
| Franck-Condon Ratio ( $A_{0,0}/A_{0,1}$ )                          | 1.42       | 1.44          | 1.42          | 1.43             | 1.43           | 1.41          |
| Specific optical rotation ( $[\alpha]_{\text{D}}^{25}$ )           | +32.5      | +15.0         | +40           | -90              | -125           | -60           |
| HOMO Calculated from DFT (eV)                                      | -5.832     | -5.825        | -5.809        | -7.869           | -7.878         | -7.885        |
| LUMO calculated from DFT (eV)                                      | -3.421     | -3.416        | -3.418        | -5.541           | -5.551         | -5.556        |
| Energy gap ( $E_g$ ) from DFT (eV)                                 | 2.41       | 2.41          | 2.39          | 2.33             | 2.33           | 2.33          |
| HOMO calculated from CV (eV)                                       | -5.479     | -5.445        | -5.559        | -7.376           | -7.414         | -7.503        |
| LUMO calculated from CV (eV)                                       | -3.531     | -3.602        | -3.647        | -5.356           | -5.366         | -5.31         |
| Energy gap ( $E_g$ ) from CV (eV)                                  | 1.95       | 1.84          | 1.91          | 2.02             | 2.05           | 2.19          |
| $\lambda_{\text{ex}}$ [nm] calculated from (TD DFT)                | 528.65     | 528.91        | 528.61        | 543.35           | 543.79         | 543.86        |
| Angle of Twist ( $^\circ$ )                                        | 1.48, 1.07 | 0.64,<br>1.06 | 1.50,<br>2.43 | -0.79, -<br>0.07 | -0.52,<br>2.00 | 1.54,<br>1.55 |

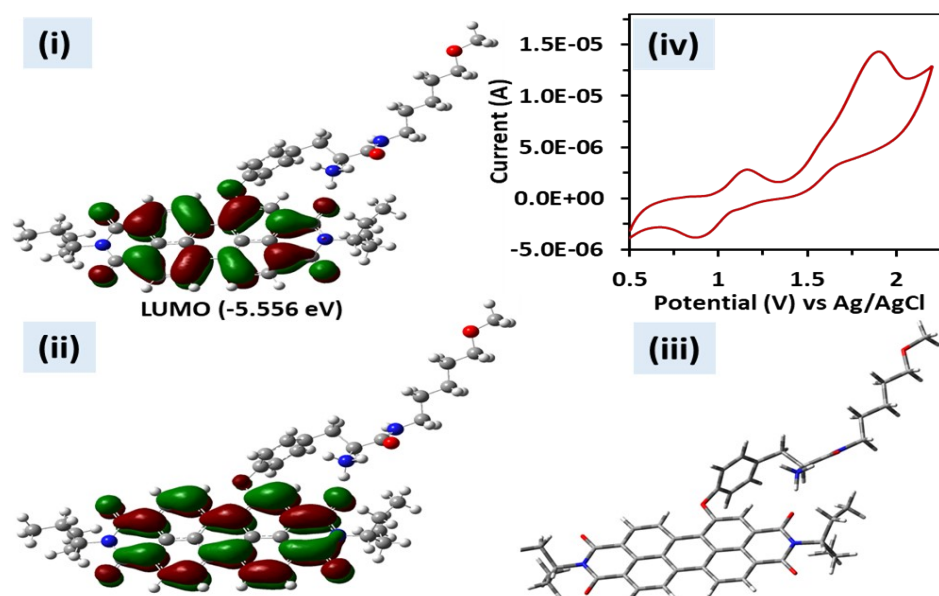**Figure S18.** HOMO-LUMO molecular orbital analysis, B3LYP/6-31G\* energy optimized structure and cyclic voltammograms (CV) of PDI **3c**. CV was recorded in  $\text{CH}_2\text{Cl}_2$  solutions containing 0.1 M TBAP as supporting electrolyte with Scan rate of  $50 \text{ mV s}^{-1}$ .

### 3. TGA data of synthesized derivatives

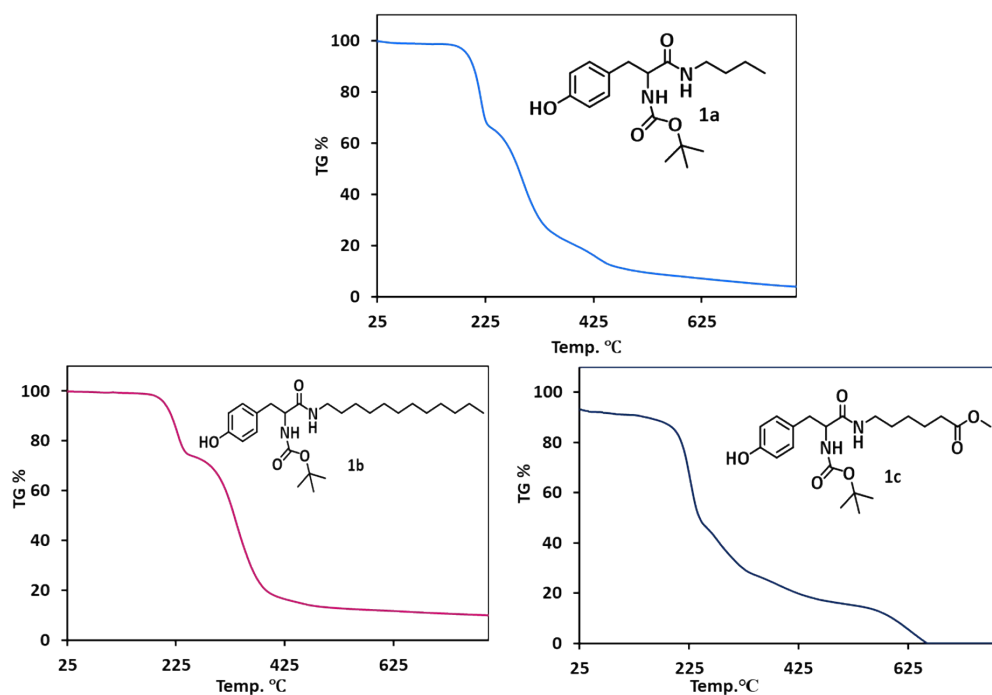

Figure S19: TGA Data of 1a-1c derivatives.

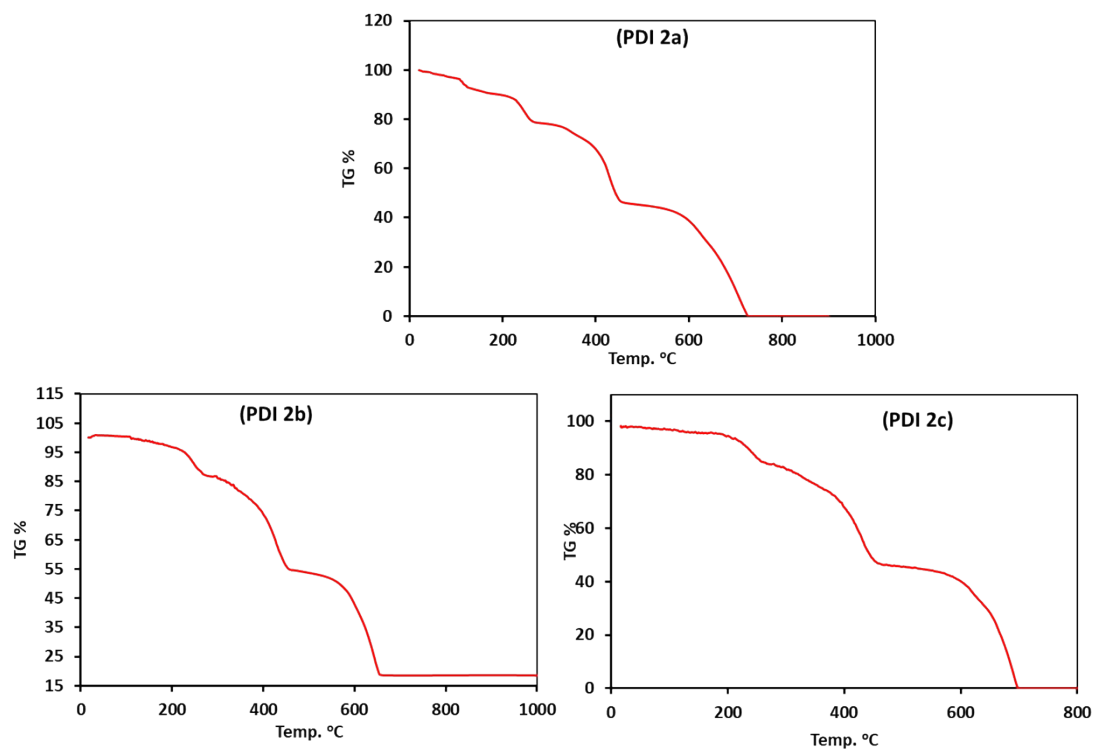

Figure S20: TGA Data of PDI 2a-2c derivatives.

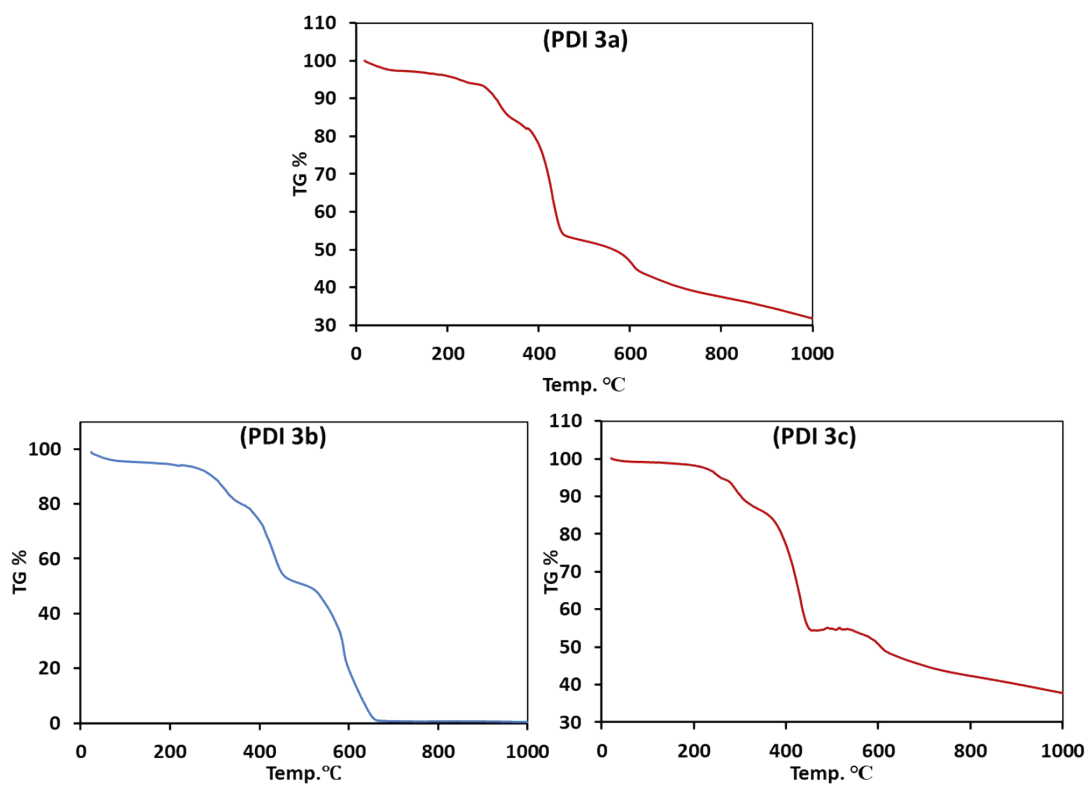

**Figure S21:** TGA Data of **PDI 3a-3c** derivatives.

#### 4. Specific Optical Rotation data of 1d, PDI 2a-2c and PDI 3a-3c

### Sample Code - PDI 1a

#### Anton Paar Polarimeter - Measurement(s)

MCP 150  
Software Version: 1.50.4074.82  
Serial Number: 82104498

##### Unique Id 529

▶ Sample Name: PR 83 A  
▶ Date: 10/31/2020 - 10:34 AM  
▶ Username: Administrator  
▶ Sample State: Ok  
  
▶ Measurement Mode: Specific Rotation  
▶ Measurement Result: +10.000 °  
▶ Concentration: +0.400 g/100ml  
▶ Optical Rotation: +0.004 °  
▶ Set Temperature: +25.0 °C  
▶ Temperature: +25.0 °C

### Sample Code - PDI 1b

#### Anton Paar Polarimeter - Measurement(s)

MCP 150  
Software Version: 1.50.4074.82  
Serial Number: 82104498

##### Unique Id 530

▶ Sample Name: PR81 A  
▶ Date: 10/31/2020 - 10:42 AM  
▶ Username: Administrator  
▶ Sample State: Ok  
  
▶ Measurement Mode: Specific Rotation  
▶ Measurement Result: +15.000 °  
▶ Concentration: +0.400 g/100ml  
▶ Optical Rotation: +0.006 °  
▶ Set Temperature: +25.0 °C  
▶ Temperature: +25.0 °C

### Sample Code - PDI 1c

#### Anton Paar Polarimeter - Measurement(s)

MCP 150  
Software Version: 1.50.4074.82  
Serial Number: 82104498

##### Unique Id 549

▶ Sample Name: PR 36  
▶ Date: 10/31/2020 - 01:42 PM  
▶ Username: Administrator  
▶ Sample State: Ok  
  
▶ Measurement Mode: Specific Rotation  
▶ Measurement Result: -5.000 °  
▶ Concentration: +0.400 g/100ml  
▶ Optical Rotation: 0.000 °  
▶ Set Temperature: +25.0 °C  
▶ Temperature: +25.0 °C

Figure S22: Specific optical rotation of 1a-1c derivatives.

### Sample Code - PDI 2a

#### Anton Paar Polarimeter - Measurement(s)

MCP 150  
Software Version: 1.50.4074.82  
Serial Number: 82104498

##### Unique Id 538

▶ Sample Name: Pr 83 B  
▶ Date: 10/31/2020 - 11:20 AM  
▶ Username: Administrator  
▶ Sample State: Ok  
  
▶ Measurement Mode: Specific Rotation  
▶ Measurement Result: +32.500 °  
▶ Concentration: +0.400 g/100ml  
▶ Optical Rotation: +0.013 °  
▶ Set Temperature: +25.0 °C  
▶ Temperature: +25.0 °C

### Sample Code - PDI 2b

#### Anton Paar Polarimeter - Measurement(s)

MCP 150  
Software Version: 1.50.4074.82  
Serial Number: 82104498

##### Unique Id 417

▶ Sample Name: b  
▶ Date: 03/12/2020 - 05:45 PM  
▶ Username: Administrator  
▶ Sample State: Ok  
  
▶ Measurement Mode: Specific Rotation  
▶ Measurement Result: +15.000 °  
▶ Concentration: +0.400 g/100ml  
▶ Optical Rotation: +0.006 °  
▶ Set Temperature: +25.0 °C  
▶ Temperature: +25.0 °C

### Sample Code - PDI 2c

#### Anton Paar Polarimeter - Measurement(s)

MCP 150  
Software Version: 1.50.4074.82  
Serial Number: 82104498

##### Unique Id 582

▶ Sample Name: PR 65  
▶ Date: 01/09/2021 - 12:00 PM  
▶ Username: Administrator  
▶ Sample State: Ok  
  
▶ Measurement Mode: Specific Rotation  
▶ Measurement Result: +40.000 °  
▶ Concentration: +0.200 g/100ml  
▶ Optical Rotation: +0.008 °  
▶ Set Temperature: +25.0 °C  
▶ Temperature: +25.0 °C  
▶ Wavelength in air: +589.28 nm  
▶ Wavelength in vacuum: +589.44 nm  
▶ Cell Length: +10.00 mm

Figure S23: Specific optical rotation of PDI 2a-2c derivatives.



### Sample Code - PDI 3a

#### Anton Paar Polarimeter - Measurement(s)

MCP 150  
Software Version: 1.50.4074.82  
Serial Number: 82104498

##### Unique Id 586

▶ Sample Name: PR 83 C  
▶ Date: 01/09/2021 - 12:57 PM  
▶ Username: Administrator  
▶ Sample State: Ok  
▶ Measurement Mode: Specific Rotation  
▶ Measurement Result: -90.000 °  
▶ Concentration: +0.200 g/100ml  
▶ Optical Rotation: -0.020 °  
▶ Set Temperature: +25.0 °C  
▶ Temperature: +25.0 °C  
▶ Wavelength in air: +589.28 nm  
▶ Wavelength in vacuum: +589.44 nm  
▶ Cell Length: +10.00 mm

### Sample Code - PDI 3b

#### Anton Paar Polarimeter - Measurement(s)

MCP 150  
Software Version: 1.50.4074.82  
Serial Number: 82104498

##### Unique Id 584

▶ Sample Name: PR 81C  
▶ Date: 01/09/2021 - 12:28 PM  
▶ Username: Administrator  
▶ Sample State: Ok  
▶ Measurement Mode: Specific Rotation  
▶ Measurement Result: -185.000 °  
▶ Concentration: +0.200 g/100ml  
▶ Optical Rotation: -0.036 °  
▶ Set Temperature: +25.0 °C  
▶ Temperature: +25.0 °C  
▶ Wavelength in air: +589.28 nm  
▶ Wavelength in vacuum: +589.44 nm  
▶ Cell Length: +10.00 mm

### Sample Code - PDI 3c

#### Anton Paar Polarimeter - Measurement(s)

MCP 150  
Software Version: 1.50.4074.82  
Serial Number: 82104498

##### Unique Id 583

▶ Sample Name: PR 65C  
▶ Date: 01/09/2021 - 12:15 PM  
▶ Username: Administrator  
▶ Sample State: Ok  
▶ Measurement Mode: Specific Rotation  
▶ Measurement Result: -60.000 °  
▶ Concentration: +0.200 g/100ml  
▶ Optical Rotation: -0.015 °  
▶ Set Temperature: +25.0 °C  
▶ Temperature: +25.0 °C  
▶ Wavelength in air: +589.28 nm  
▶ Wavelength in vacuum: +589.44 nm  
▶ Cell Length: +10.00 mm

Figure S24: Specific optical rotation of PDI 3a-3c derivatives.

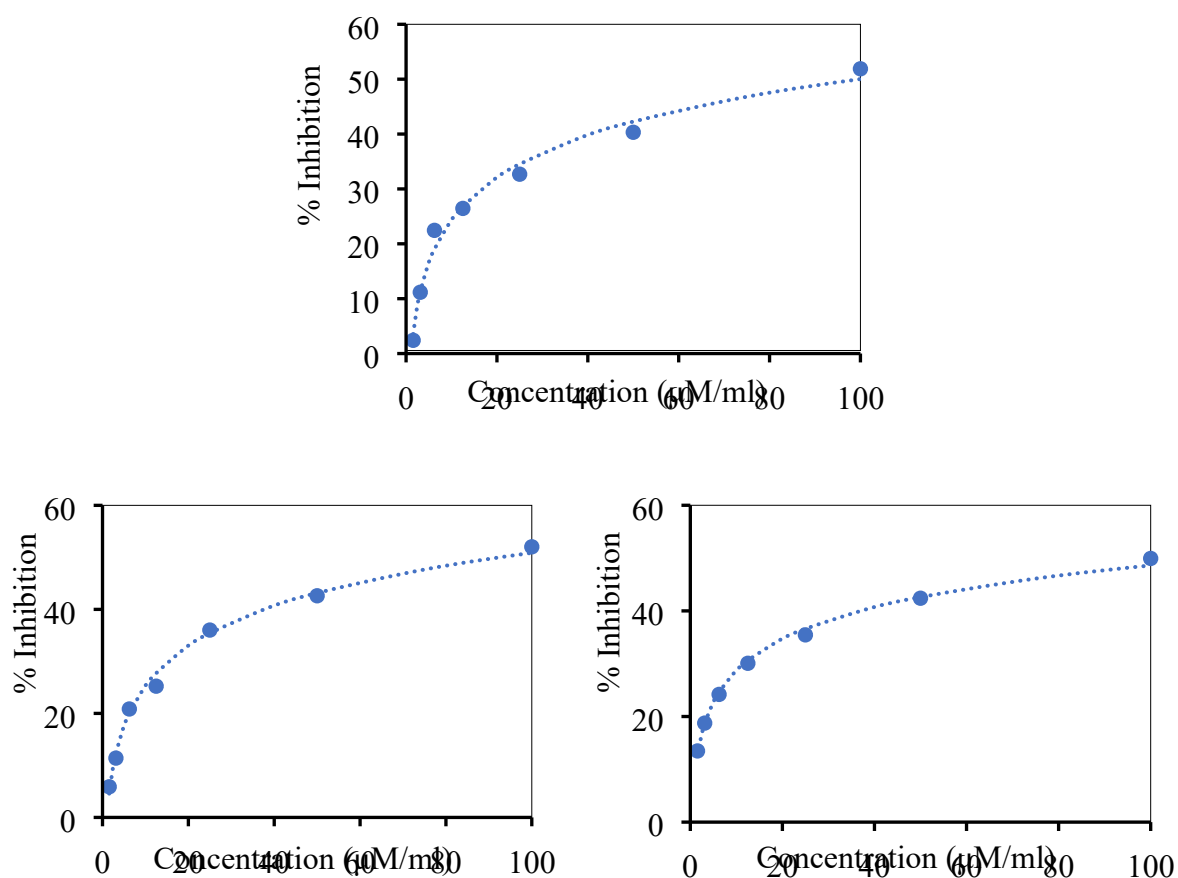

Figure S25: MTT assay of PDI 3a-c.

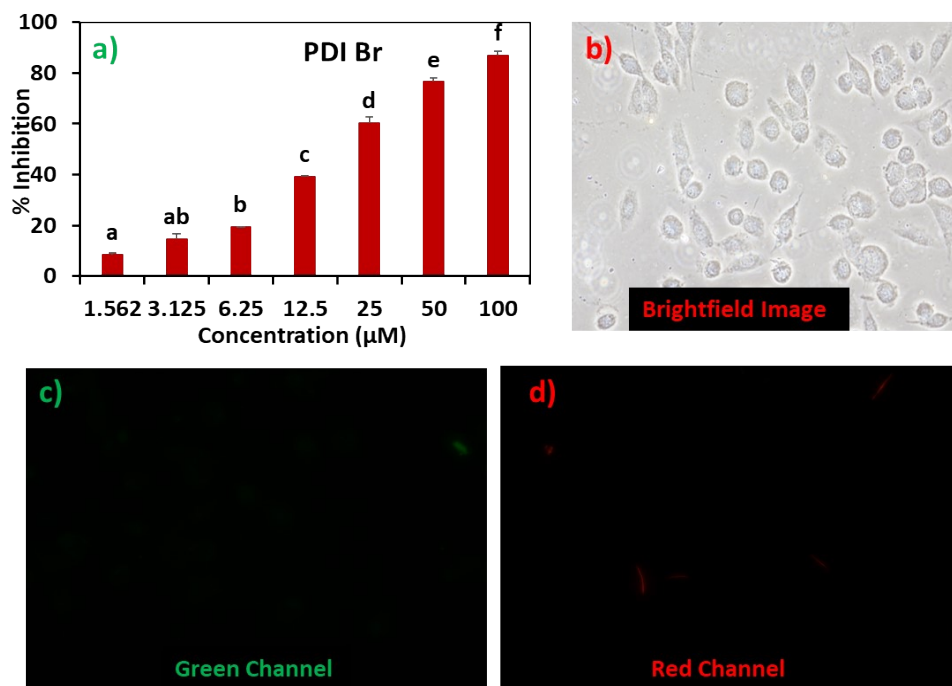

**Figure S26** (a) MTT assay of PDI Br; (b) brightfield image; (c, d) fluorescence images of MG-63 cells incubated with PDI Br (1 µM) for 30 minutes.

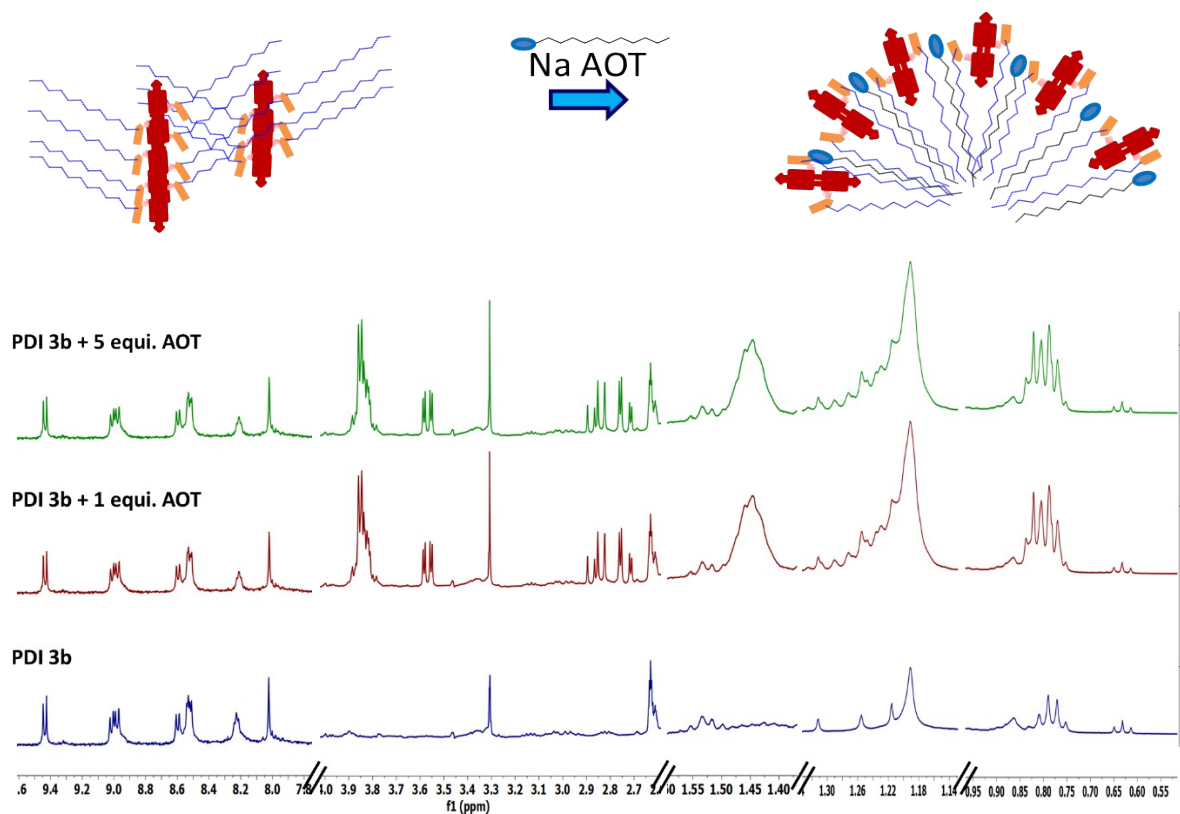

**Figure S27:** (top) Proposed ionic self-assembly of PDI 3b with Na AOT and (bottom) <sup>1</sup>H NMR titration of PDI 3b upon addition of NaAOT recorded in DMSO (d<sub>6</sub>).
